# Supplementary material for: Follow My Lead: Assertive Cheap Talk and the Gender Gap
Source: Atypon-hosted journal article supplement (doi:10.1287/mnsc.2020.3837), 2021-02-17
Supplement: mnsc.2020.3837.sm2.pdf [file mnsc.2020.3837.sm2.pdf]

## Online Appendix

### A Experiment Details

#### A.1 Timeline and Summary of Key Activities

We conducted an initial experiment with undergraduate students from the University of California Merced (435 subjects). The experiment was implemented as a self-guided online survey hosted on Qualtrics. This sample was 65 percent female with a mean age of 20 and mean grade point average of 3.0. To confirm the reproducibility of our results, we conduct a replication experiment on Amazon MTurk, an online platform that allows researchers to post small tasks (576 subjects). We recorded an additional 339 MTurk workers who began the survey, but did not complete it. However, the significant majority (72 percent) stopped prior to the revelation of the team leader. The remaining 94 are balanced across treatment arms making it unlikely that treatment assignment resulted in differential demand to complete the experiment. SI Appendix Table [A1](#) shows that attrition in the sample is balanced across treatment arms. Recent research has suggested that Amazon MTurk workers are more representative of the US population than American university students and that the resulting data is no less reliable than when obtained in a traditional lab (Horton, Rand and Zeckhauser, 2011; Paolacci, Chandler and Ipeirotis, 2010; Buhrmester, Kwang and Gosling, 2011). This replication sample was 38 percent female, with a mean age of 34 and mean level of education of college credit with no degree.<sup>25</sup> Additional summary statistics for both samples can be found in Appendix Table [A2](#).

A timeline of activities is shown below. We have also included links to pre-registrations in the American Economics Association registry and to the Qualtrics surveys that were administered to subjects. After clicking on any of the links below, the Qualtrics surveys can be previewed without entering data by selecting “Ignore Validation” in the settings. Note that labeling of the subjects’ choices and computer’s response were randomly chosen from five different options (for example, some subjects selected numbers while others selected letters).

#### **March 2018:** [Leader experiment at Washington State University](#)

---

<sup>25</sup>3 subjects did not report gender and 10 subjects did not report GPA in the original sample. 6 subjects did not report gender in the replication sample.

**March 2018:** Validation of pseudonyms and messages at Washington State University

**April 2018:** [Pre-registration of UC Merced Experiment](#)

**April 2018:** [UC Merced Experiment, Day 1, 36 subjects](#)

**April 2018:** [UC Merced Experiment, Day 2-3, 184 subjects](#)

**April 2018:** [UC Merced Experiment, Day 4-6, 215 subjects](#)

**August 2018:** [Pre-registration of MTurk Replication and Elicitation of Expert Priors](#)

**August 2018:** [MTurk Replication](#)

**September 2018:** [Elicitation of Expert Priors](#)

## **A.2 Validation of Treatment Variations**

We used three methods to communicate the gender of the team leader: (1) directly stating it, (2) showing a gendered avatar, and (3) using a gendered pseudonym. An example of the gendered avatar is shown in Figure A1. Team leaders were randomly assigned one out of 26 possible gendered pseudonyms. These pseudonyms were selected from the most popular 52 names for each gender in the 1990s, according to Social Security data. We further narrowed the list by selecting 26 names for which the gender was unambiguous and the perception of age, income, education, and race were balanced across gender perception. Gender perception was determined based on 74 students from Washington State University who reviewed 10 pseudonyms each on the gender, age, income, education, and race of the pseudonym. Subjects were given a list of ten names and the following directions.

*Use the following rubric in guessing the average characteristic of people who have the following names:*

**Age:** What is the average age for people with this name? Respond with any number.

**Gender:** What is the most likely gender of people with this name? Respond with F for female, M for male

**Income Ranking:** Where do you think people with this name fall in the distribution of income in the United States – in the bottom 25%, between 26 and 50% (i.e., lower middle), between 51 to 75% (upper middle), or the top 25

**Education:** What is the average years of schooling completed by people of this name? Respond with any number. (1 = 1st grade, 2 = 2nd grade, ..., 12 = completed high school, 14: associates degree, 16: bachelors degree, 18: masters degree, 20: PhD/Medical degree).

**Race:** What do you think is the most likely race/ethnicity of people with this name? Respond with WH: White Hispanic, WN: White Non-Hispanic, B: Black or African American, A: Asian, or O: other race.

### A.2.1 Cheap talk Validation

Prior to the experiments, 74 students at Washington State University were shown the “least assertive” (“most assertive”) advice and “moderately assertive” advice for each round of the *Individual Game* (randomly ordered), and given the following instructions: “Please review the following pairs of messages. For each pair, **circle the message that you believe is more self-deprecating (self-promotional)**. For each pair, you will notice one message has more language in it – we’re essentially asking you whether you think that language increases or decreases the self-deprecation (self-promotion) in the messages. There are no right or wrong answers.” More than 70 percent of the messages were correctly identified as being “more self-promotional” (71 percent) or “more self-deprecating” (77 percent). These results suggest the scripts reflected assertiveness and alignment with gender norms as expected. The scripts are shown in Figure 5.

### A.3 Pre-registered analyses

All pre-registered analyses are shown in Tables [A2-A17](#) below, with one exception. In the pre-analysis plan for the UCM experiment, we specified heterogeneity analyses based on exposure to a female supervisor and subject gender attitudes. Given the smaller than expected effect sizes in the experiment and the fact that there is almost no variation in exposure to a female supervisor (Table [A2](#)), we are underpowered to study heterogeneity and have therefore omitted these tables.

## Expert Priors

We also pre-registered an analysis of how our results compared to expert priors. Given a large body of existing literature demonstrating backlash to assertive women, we studied whether our results align with the expectations of experts in gender research. Following DellaVigna and Pope (2018), we asked experts to provide their expectations for the estimated effects in the experiment. Fourteen anonymous researchers in economics and psychology provided expectations for the gender gap we would observe in each of the language treatments. In DellaVigna and Pope (2018), averaging over just five experts eliminated high-error forecasts, and the accuracy of the prediction made by 20 experts was indistinguishable from their full sample of 208 experts; therefore, we consider our sample of 14 experts sufficient.

Focusing on Round 1, experts were informed of the proportion of subjects who followed advice from a male leader for each type of cheap talk, and were asked about the average gender gap in advice adherence for the combined UCM and MTurk samples. On average, the experts in our sample predicted more discrimination against female leaders than was observed in the experiment. Across all cheap talk treatment arms, experts expected that having a female leader would reduce the likelihood of following advice by 5.52 percentage points, while the actual gender gap was 1.32 percentage points. However, these estimates were not statistically different.

This pattern was generally maintained when we disaggregated by cheap talk treatment. The mean priors for gender gaps in each cheap talk treatment arm were 6 percentage points for the least assertive (i.e., self-deprecating) cheap talk, 3 percentage points for moderately assertive (i.e., neutral) cheap talk, and 8 percentage points for most assertive (i.e., self-promoting) cheap talk. The actual gender gap was smaller than that predicted by experts in all but the least assertive self-deprecating treatment. However, the estimated gap was statistically different from the mean expert prior only in the neutral treatment.

The experts also predicted a widening of gender gaps in both the most and least assertive (i.e., self-promoting and self-deprecating) treatments, relative to the moderately assertive (i.e., neutral) treatment. While we cannot rule out that the gender gaps were identical across cheap talk treatments in the experiment, the pattern in the point estimates mirrors expert expectations. Thus, our results are consistent with existing expert priors on gender discrimination.

## Variable definitions

Variables shown in the tables are defined as follows:

- Strategic in R1: Indicator for whether the subject played strategically (i.e., followed the leader's advice) in round 1 of the *Individual Game*.
- Mean Strategic, R1 – R3: Subject average of whether the subject played strategically (i.e., followed the leader's advice) in round 1 to round 3 of the *Individual Game* (range is 0 to 1).
- Mean Strategic, All: Subject average of whether the subject played strategically (i.e., followed the leader's advice) in all ten rounds of the *Individual Game* (range is 0 to 1).
- Expected Leader Performance: Subject's belief of the number of points earned by the team leader over all ten rounds in the *Individual Game*. Subjects were asked to select the ventile over the range of possible points (range is 1 to 20).
- Retained Leader: Indicator for whether the subject kept the team leader (as opposed to getting a new team leader) for a final incentivized game.
- Leader Evaluation: Summary index of the following 16 questions evaluating the team leader (range -2.19 to 1.3, increasing in positive evaluation of the team leader)(Anderson, 2008).
- Unless otherwise noted, subjects were asked to evaluate the team leader based on the following statements and using the following scale: 1: Disagree strongly, 2: Disagree, 3: Disagree a little, 4: Neither agree nor disagree, 5: Agree a little, 6: Agree, 7: Strongly Agree.
  - I would recommend *Pseudonym* as a colleague to others.
  - I would recommend *Pseudonym* as a supervisor to others.
  - *Pseudonym*'s explanations were clear.
  - I earned more points on the game because of *Pseudonym*.
  - *Pseudonym* made me feel confident in my ability to play the game.
  - I enjoyed working with *Pseudonym*.
  - How would you describe *Pseudonym*? Options: Not confident, Somewhat confident,

- Appropriately confident, Overly Confident
  - *Pseudonym* was convincing in [his/her] messages.
  - *Pseudonym* treated me with respect.
  - *Pseudonym* would be approachable for an issue that bothered me.
  - *Pseudonym* would keep calm and have good judgement in pressured situations.
  - *Pseudonym* instilled a sense of teamwork.
  - *Pseudonym* has effective leadership skills.
  - *Pseudonym* was effective overall.
  - *Pseudonym* exaggerated the value of [his/her] advice.
  - *Pseudonym* has strong interpersonal skills.
- Message Recall: Number of messages (of four) correctly identified as having received or not received from their team leader in the *Individual Game* (range 0 to 4).
  - Self-Power: Summary index of the following 8 questions evaluating their own feelings of power and control. For questions decreasing in power, the measure was reversed such that a higher number indicated greater self-power (range -2.75 to 1.54, increasing in self-power). (Anderson, 2008)
  - Subjects were asked to evaluate the following statements using the following scale: 1 = Disagree strongly, 2 = Disagree, 3 = Disagree a little, 4 = Neither agree nor disagree, 5 = Agree a little, 6 = Agree, 7 = Strongly Agree
    - In my relationship with others, I can get people to listen to what I say.
    - In my relationship with others, my wishes do not carry much weight.
    - In my relationship with others, I can get others to do what I want.
    - In my relationship with others, even if I voice them, my views have little sway.
    - In my relationship with others, I think I have a great deal of power.
    - In my relationship with others, my ideas and opinions are often ignored.

- In my relationship with others, even when I try, I am not able to get my way.
  - In my relationship with others, if I want to, I get to make decisions.
- Strategic in Coordination: Indicator for whether the subject played strategically (i.e., followed the leader’s advice) in the *Coordination Game* (range 0 to 1).
  - Strategic in Coordination – Strategic, R1: The difference between whether the subject played strategically (i.e., followed the leader’s advice) in the *Coordination Game* and whether the subject played strategically (i.e., followed the leader’s advice) in the *Individual Game*, Round 1 (range -1 to 1).
  - Strategic in Coordination – Strategic, R10: The difference between whether the subject played strategically (i.e., followed the leader’s advice) in the *Coordination Game* and whether the subject played strategically (i.e., followed the leader’s advice) in the *Individual Game*, Round 10 (range -1 to 1).
  - Selects Leader for Risky Puzzle: An indicator for whether the subject selected the team leader to play an incentive logic game in which the subject gained earnings if the team leader performed well and lost earnings if the team leader performed poorly (range 0 to 1).
  - Strategic in Practice: Indicator for whether the subject played strategically in a practice round for the *Individual Game*, prior to observing the team leader’s advice.
  - Strategic Coordination in Practice: Indicator for whether the subject played strategically in a practice round for the *Coordination Game*, prior to observing the team leader’s advice for the *Coordination Game*.
  - Subject Prefers Most Assertive (Least Assertive): Indicator that subject selects messages from the Most Assertive (Least Assertive) treatment arm if he/she were a team leader in the *Individual Game*, instead of messages from the Moderately Assertive or Least Assertive (Most Assertive) treatment arm.
  - Peers Prefer Male [Female] Advice for UCM subjects: Indicator for subject reporting that peers are more likely to follow advice provided by males [females] leaders in the *Individual*

*Game*, relative to being more likely to follow advice by the opposite gender or both genders equally (range 0 to 1).

- Peers Prefer Male [Female] Advice for MTurk subjects: Indicator for whether the subject reported more MTurk subjects following the team leader’s advice in Round 1 of the *Individual Game* when provided by a male [female] team leader than when provided by a female [male] team leader (range 0 to 1).
- Gender Gap in Following Advice, R1: Difference between the subject’s expectation of the percentage of MTurk subjects following the advice in Round 1 of the *Individual Game* when provided by a male team leader relative to when provided by a female team leader (range -100 to 100).
- Gender Gap in Following Advice, Coordination: Difference between the subject’s expectation of the percentage of MTurk subjects following the advice in the *Coordination Game* when provided by a male team leader relative to when provided by a female team leader (range -100 to 100).
- Perceived Leader Confidence: Response to “How would you describe *Pseudonym*? Not Confident, Somewhat Confident, Appropriately Confident, Overly Confident” (range 1 to 4, increasing in the perceived team leader’s confidence).
- Perceived Cheap talk Assertiveness: Response to “How would you rate *Pseudonym*’s communication style? Submissive/under assertive, Appropriately Assertive, Overly assertive/aggressive” (range 1 to 3, increasing in assertiveness).
- Accurate Leader Gender Recall: Indicator for whether the subject accurately recalled the team leader’s gender (range 0 to 1).
- Characterized Messages as Masculine[Feminine]: Indicator for subject characterizing the language used in the team leader’s messages for the *Individual Game* as more masculine [feminine], as opposed to more feminine[masculine] or gender-neutral (range 0 to 1).
- Female Subject: Indicator for subject self-reporting female (range 0 to 1).

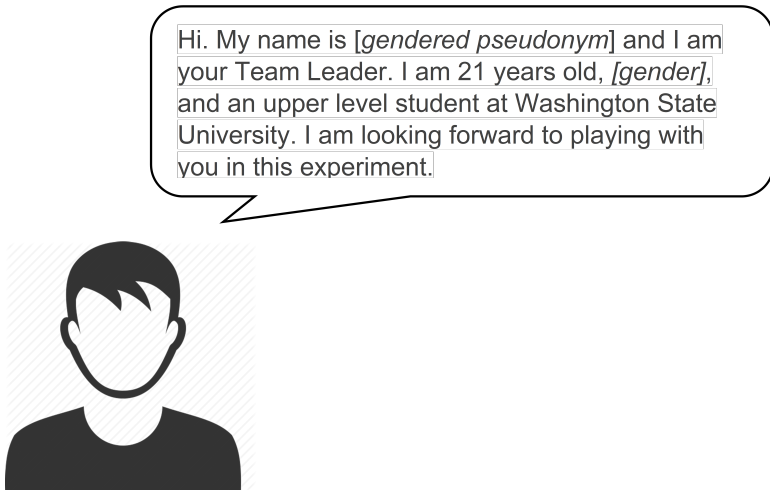

Figure A1: Gendered Image

- Subject's Age: Subject's self-reported age (range 18 to 41 for UCM and 19 to 84 for MTurk).
- Subject's GPA: Subject's self-reported grade point average.
- Subject's Education: Subjects self-reported educational attainment based on ten categories (range 1 to 10, increasing in educational attainment).
- Subject was Aware of Experiment: Indicator for whether the subject discussed, heard, or read information about the contents of this experiment prior to participation (range 0 to 1).
- Subject had Female Supervisor: Indicator for subject reporting ever had a female supervisor (range 0 to 1).
- Subject's Gender Attitude: Summary index of the following 10 questions measuring gender attitudes. For questions positive gender attitudes, the measure was reversed such that a higher number indicated more positive gender attitudes (range -1.37 to 1.15 increasing in self-power).(Anderson, 2008)

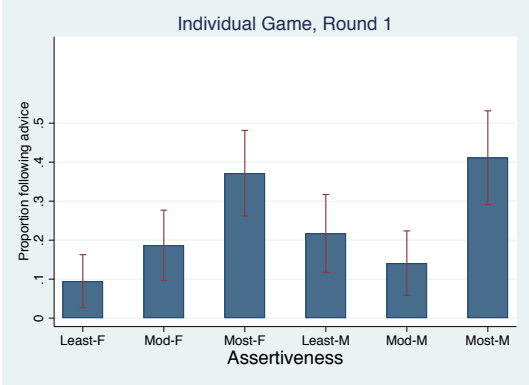

Figure A2: The Likelihood of Following Advice, *Individual Game*, Round 1, Original Experiment

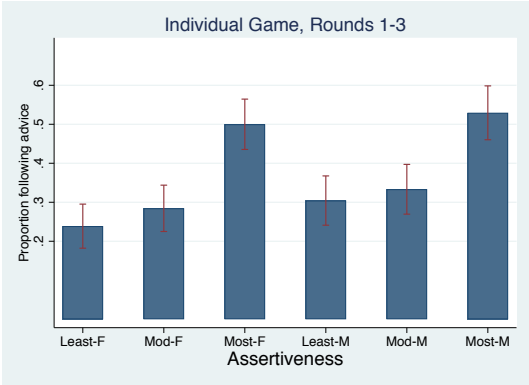

Figure A3: The Likelihood of Following Advice, *Individual Game*, Round 1 to 3, Original Experiment

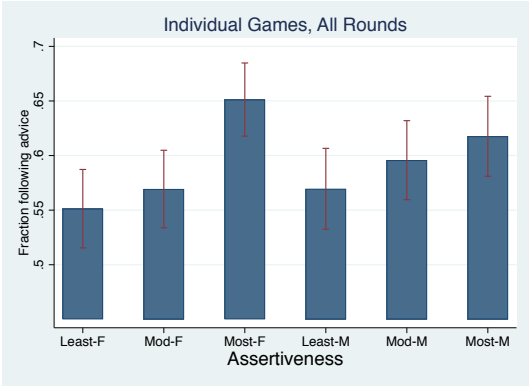

Figure A4: The Likelihood of Following Advice, *Individual Game*, All Rounds, Original Experiment

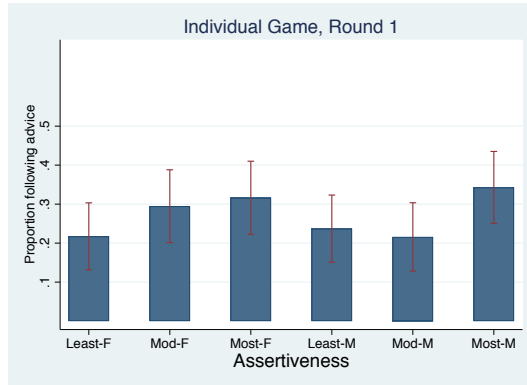

Figure A5: The Likelihood of Following Advice, *Individual Game*, Round 1, Replication Experiment

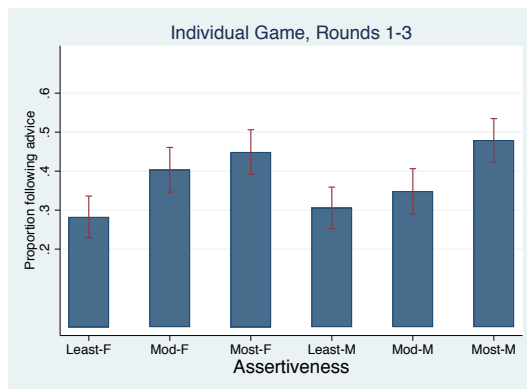

Figure A6: The Likelihood of Following Advice, *Individual Game*, Round 1 to 3, Replication Experiment

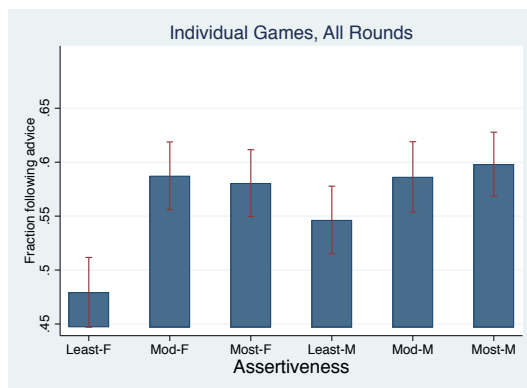

Figure A7: The Likelihood of Following Advice, *Individual Game*, All Rounds, Replication Experiment

Table A1: MTurk Attrition

| <i>Dependent Variable:</i>       | Dropped              |
|----------------------------------|----------------------|
| Fem. Leader, Least Assertive     | 0.0207<br>(0.0559)   |
| Male Leader, Mod. Assertive      | 0.0592<br>(0.0561)   |
| Fem. Leader, Mod. Assertive      | 0.000574<br>(0.0556) |
| Male Leader, Most Assertive      | -0.0349<br>(0.0543)  |
| Fem Leader, Most Assertive       | 0.0140<br>(0.0551)   |
| Constant (Male, Least Assertive) | 0.362***<br>(0.0391) |
| Observations                     | 915                  |

\*  $p < 0.10$ , \*\*  $p < 0.05$ , \*\*\*  $p < 0.01$ . Robust standard errors in parentheses. Dropped is an indicator for any MTurk participant who was not included in the final analysis, due to not completing the survey, lack of consent, and suggestive evidence of having participated in the experiment earlier. 70 percent of those excluded stopped the experiment prior to observing any differences based on treatment.

Table A2: Summary Statistics

|                                              | (1)<br>Original (UCM) | (2)<br>Replication (MTurk) | (3)<br>Difference |
|----------------------------------------------|-----------------------|----------------------------|-------------------|
| Strategic in R1                              | 0.24                  | 0.27                       | -0.04             |
| Mean Strategic, R1-R3                        | 0.36                  | 0.38                       | -0.02             |
| Mean Strategic, All                          | 0.59                  | 0.56                       | 0.03              |
| Expected Leader Performance                  | 10.24                 | 10.15                      | 0.08              |
| Retained Leader                              | 0.93                  | 0.89                       | 0.03              |
| Leader Evaluation                            | -0.08                 | 0.06                       | -0.15***          |
| Message Recall                               | 3.17                  | 2.79                       | 0.37***           |
| Self Power                                   | -0.01                 | -0.00                      | -0.00             |
| Strategic in Coordination                    | .                     | 0.82                       |                   |
| Strategic in Coordination - Strategic, R1    | .                     | 0.55                       |                   |
| Strategic in Coordination - Strategic, R10   | .                     | 0.09                       |                   |
| Selects Leader for Risky Puzzle              | 0.76                  | .                          |                   |
| Strategic in Practice                        | 2.44                  | 2.62                       | -0.17**           |
| Strategic Coordination in Practice           | .                     | 0.38                       |                   |
| Subject Prefers Deprecating                  | 0.11                  | 0.10                       | 0.01              |
| Subject Prefers Promoting                    | 0.37                  | 0.30                       | 0.06              |
| Peers Prefer Male Advice                     | 0.36                  | 0.64                       | -0.28***          |
| Peers Prefer Female Advice                   | 0.08                  | 0.22                       | -0.15***          |
| Gender Gap in Following Advice, R1           | .                     | 8.83                       |                   |
| Gender Gap in Following Advice, Coordination | .                     | 7.50                       |                   |
| Perceived Leader Confidence                  | 2.90                  | 2.93                       | -0.03             |
| Perceived Cheaptalk Assertiveness            | 1.92                  | 1.97                       | -0.05             |
| Characterized Messages as Masculine          | 0.09                  | 0.26                       | -0.16***          |
| Characterized Messages as Feminine           | 0.09                  | 0.23                       | -0.14***          |
| Accurate Leader Gender Recall                | 0.95                  | 0.92                       | 0.03              |
| Female Subject                               | 0.65                  | 0.38                       | 0.27***           |
| Subject's Age                                | 19.77                 | 34.01                      | -14.24***         |
| Subject's GPA                                | 3.01                  | .                          |                   |
| Subject's Education                          | .                     | 5.99                       |                   |
| Subject was Aware of Experiment              | .                     | 0.09                       |                   |
| Subject had Female Supervisor                | 0.89                  | 0.85                       | 0.05*             |
| Subject's Gender Attitude                    | -0.00                 | .                          |                   |
| Observations                                 | 435                   | 575                        | 1010              |

UCM refers to the original sample at UC Merced, MTurk refers to the replication sample on Amazon MTurk, and All refers to both samples combined. Columns report sample means for each variable. Variables not reported were not asked in the respected experiment. Message recall was not collected for the first 35 subjects and Peers Prefer Male(Female) Advice was collected for the latter 215 subjects at UCM. Among UCM subjects 2.3 percent did not report their GPA and 3 percent did not report Perceived Cheaptalk Assertiveness. 11 percent of MTurk subjects and 13 percent of UCM subjects did not respond for Subject Had Female Supervisor. For all remaining variables, non response was less than 2 percent in each sample. Variable definitions are provided in the Appendix.

Table A3: Balance on Subject Characteristics, Main Specification

|                                  | (1)                  | (2)                | (3)                 | (4)                | (5)                 |
|----------------------------------|----------------------|--------------------|---------------------|--------------------|---------------------|
|                                  | Female               | Age                | GPA                 | Education          | Strategic Practice  |
| Female Leader                    | -0.0350<br>(0.0504)  | 0.391<br>(0.999)   | 0.154**<br>(0.0763) | -0.0936<br>(0.263) | 0.00885<br>(0.0248) |
| Assertive                        | -0.00906<br>(0.0273) | -0.101<br>(0.519)  | 0.0524<br>(0.0448)  | 0.0918<br>(0.128)  | 0.0104<br>(0.0139)  |
| Female Leader $\times$ Assertive | 0.00802<br>(0.0386)  | -0.0846<br>(0.756) | -0.0866<br>(0.0628) | -0.0515<br>(0.192) | 0.00476<br>(0.0203) |
| Observations                     | 1001                 | 1010               | 425                 | 574                | 1010                |

\*  $p < 0.10$ , \*\*  $p < 0.05$ , \*\*\*  $p < 0.01$ . Robust standard errors in parentheses. Assertive is a variable ranging from 0 to 2, increasing in the assertiveness of the cheap talk. Columns 1, 2, and 5 include observations from the original sample at UC Merced and the replication sample on Amazon MTurk. Column 3 is limited to subjects from the original UC Merced sample and Column 4 to subjects from the MTurk replication sample. Female is an indicator for the subject being female. Age, GPA (grade point average), and Education are self-reported responses of the subject. Education ranges from 1 to 10, increasing in the completion of educational degrees. Strategic Practice is an indicator for whether the subject selected to play strategically in the practice round, prior to receiving any advice. Subjects that did not respond to characteristics are omitted.

Table A4: Balance on Subject Characteristics, by Treatment

|                                 | (1)<br>Female        | (2)<br>Age          | (3)<br>GPA           | (4)<br>Education    | (5)<br>Strategic Practice |
|---------------------------------|----------------------|---------------------|----------------------|---------------------|---------------------------|
| Least Assertive-Female          | 0.00595<br>(0.0552)  | -0.0904<br>(1.081)  | 0.146*<br>(0.0833)   | 0.0152<br>(0.291)   | 0.00602<br>(0.0268)       |
| Mod. Assertive-Male             | 0.0880<br>(0.0554)   | 0.0345<br>(1.050)   | 0.0158<br>(0.0758)   | 0.308<br>(0.274)    | 0.00265<br>(0.0268)       |
| Mod. Assertive-Female           | -0.0237<br>(0.0548)  | 1.276<br>(1.187)    | 0.0965<br>(0.0896)   | -0.0653<br>(0.278)  | 0.0221<br>(0.0281)        |
| Most Assertive-Male             | -0.0170<br>(0.0545)  | -0.199<br>(1.039)   | 0.105<br>(0.0897)    | 0.189<br>(0.257)    | 0.0207<br>(0.0278)        |
| Most Assertive-Female           | 0.00338<br>(0.0545)  | -0.431<br>(1.081)   | 0.0777<br>(0.0877)   | 0.0929<br>(0.264)   | 0.0363<br>(0.0290)        |
| Constant (Least Assertive-Male) | 0.488***<br>(0.0389) | 27.78***<br>(0.751) | 2.940***<br>(0.0585) | 5.897***<br>(0.190) | 0.0602***<br>(0.0185)     |
| Observations                    | 1001                 | 1010                | 425                  | 574                 | 1010                      |

\*  $p < 0.10$ , \*\*  $p < 0.05$ , \*\*\*  $p < 0.01$ . Robust standard errors in parentheses. Columns 1, 2, and 5 include observations from the original sample at UC Merced and the replication sample on Amazon MTurk. Column 3 is limited to subjects from the original UC Merced sample and Column 4 to subjects from the MTurk replication sample. Female is an indicator for the subject being female. Age, GPA (grade point average), and Education are self-reported responses of the subject. Education ranges from 1 to 10, increasing in the completion of educational degrees. Strategic Practice is an indicator for whether the subject selected to play strategically in the practice round, prior to receiving any advice. Subjects that did not respond to characteristics are omitted.

Table A5: Do Subject Characteristics Predict Following Advice?

| <i>Dependent Variable:</i> | Strategic Play       |                         |                       |
|----------------------------|----------------------|-------------------------|-----------------------|
|                            | (1)<br>UCM           | (2)<br>MTurk            | (3)<br>Combined       |
| Female                     | 0.0418*<br>(0.0244)  | 0.0494**<br>(0.0250)    | 0.0449**<br>(0.0176)  |
| Age                        | 0.00250<br>(0.00521) | 0.00222*<br>(0.00119)   | 0.00223*<br>(0.00117) |
| GPA                        | -0.0228<br>(0.0219)  |                         |                       |
| Education                  |                      | -0.0177***<br>(0.00621) |                       |
| Practice Round             | -0.0219<br>(0.0410)  | 0.148***<br>(0.0537)    | 0.0628*<br>(0.0348)   |
| Round FE                   | X                    | X                       | X                     |
| Sample FE                  |                      |                         | X                     |
| Observations               | 4230                 | 5690                    | 10010                 |

\*  $p < 0.10$ , \*\*  $p < 0.05$ , \*\*\*  $p < 0.01$ . Standard errors in parentheses, clustered at the individual level. Round FE are fixed effects for each of the ten rounds played. Sample fixed effects are fixed effects reflecting whether the subject participated in the original experiment at UC Merced or the replication experiment on Amazon MTurk. UCM refers to the original sample at UC Merced, MTurk refers to the replication sample on Amazon MTurk, and Combined refers to both samples combined. Female is an indicator for the subject being female. Age, GPA (grade point average), and Education are self-reported responses of the subject. Education ranges from 1 to 10, increasing in the completion of educational degrees. Practice Round is an indicator for playing strategically in practice round. GPA was asked only for the UCM sample, Education was asked only for the MTurk sample. Subjects that did not respond to characteristics are omitted.

Table A6: Gender Gaps on Average and Conditional on Assertiveness of Cheap Talk (Round 1 and All Rounds)

| <i>Dependent Variable:</i>                      | Strategic Play       |                     |                     |                      |                      |                     |
|-------------------------------------------------|----------------------|---------------------|---------------------|----------------------|----------------------|---------------------|
|                                                 | Round 1              |                     |                     | All Rounds           |                      |                     |
|                                                 | (1)<br>UCM           | (2)<br>MTurk        | (3)<br>All          | (4)<br>UCM           | (5)<br>MTurk         | (6)<br>All          |
| <i>Panel A: Full Sample</i>                     |                      |                     |                     |                      |                      |                     |
| Fem. Leader                                     | -0.0440<br>(0.0403)  | 0.00914<br>(0.0363) | -0.0147<br>(0.0270) | -0.00227<br>(0.0223) | -0.0268<br>(0.0248)  | -0.0174<br>(0.0171) |
| Observations                                    | 435                  | 575                 | 1010                | 4350                 | 5750                 | 10100               |
| Male Mean                                       | 0.255                | 0.269               | 0.263               | 0.594                | 0.577                | 0.584               |
| <i>Panel B: Most Assertive Cheap Talk</i>       |                      |                     |                     |                      |                      |                     |
| Fem. Leader                                     | -0.0575<br>(0.0791)  | -0.0182<br>(0.0642) | -0.0372<br>(0.0498) | 0.0325<br>(0.0429)   | -0.0147<br>(0.0440)  | 0.00279<br>(0.0313) |
| Observations                                    | 146                  | 203                 | 349                 | 1460                 | 2030                 | 3490                |
| Male Mean                                       | 0.412                | 0.343               | 0.370               | 0.618                | 0.598                | 0.606               |
| <i>Panel C: Moderately Assertive Cheap Talk</i> |                      |                     |                     |                      |                      |                     |
| Fem. Leader                                     | 0.0393<br>(0.0615)   | 0.0781<br>(0.0643)  | 0.0611<br>(0.0449)  | -0.0237<br>(0.0340)  | 0.00101<br>(0.0423)  | -0.0106<br>(0.0279) |
| Observations                                    | 146                  | 183                 | 329                 | 1460                 | 1830                 | 3290                |
| Male Mean                                       | 0.141                | 0.216               | 0.182               | 0.596                | 0.586                | 0.591               |
| <i>Panel D: Least Assertive Cheap Talk</i>      |                      |                     |                     |                      |                      |                     |
| Fem. Leader                                     | -0.124**<br>(0.0609) | -0.0216<br>(0.0582) | -0.0662<br>(0.0426) | -0.0176<br>(0.0377)  | -0.0679*<br>(0.0407) | -0.0467<br>(0.0285) |
| Round FE                                        |                      |                     |                     | X                    | X                    | X                   |
| Practice round                                  | X                    | X                   | X                   | X                    | X                    | X                   |
| Sample FE                                       |                      |                     | X                   |                      |                      | X                   |
| Observations                                    | 143                  | 189                 | 332                 | 1430                 | 1890                 | 3320                |
| Male Mean                                       | 0.217                | 0.237               | 0.229               | 0.570                | 0.546                | 0.556               |

Table A7: Following Advice

|                            | Round 1              |                     |                      | Round 1 to 3         |                     |                      | All Rounds          |                      |                     |
|----------------------------|----------------------|---------------------|----------------------|----------------------|---------------------|----------------------|---------------------|----------------------|---------------------|
|                            | (1)<br>UCM           | (2)<br>MTurk        | (3)<br>All           | (4)<br>UCM           | (5)<br>MTurk        | (6)<br>All           | (7)<br>UCM          | (8)<br>MTurk         | (9)<br>All          |
| Fem. Leader                | 0.0370<br>(0.0613)   | 0.0770<br>(0.0649)  | 0.0581<br>(0.0451)   | -0.0517<br>(0.0482)  | 0.0538<br>(0.0555)  | 0.00581<br>(0.0376)  | -0.0256<br>(0.0339) | 0.000381<br>(0.0425) | -0.0122<br>(0.0280) |
| Most Assertive             | 0.257***<br>(0.0717) | 0.132**<br>(0.0626) | 0.180***<br>(0.0469) | 0.191***<br>(0.0508) | 0.134**<br>(0.0525) | 0.153***<br>(0.0372) | 0.0233<br>(0.0391)  | 0.0135<br>(0.0419)   | 0.0157<br>(0.0294)  |
| Least Assertive            | 0.0729<br>(0.0644)   | 0.0282<br>(0.0593)  | 0.0462<br>(0.0436)   | -0.0302<br>(0.0470)  | -0.0382<br>(0.0495) | -0.0365<br>(0.0348)  | -0.0258<br>(0.0371) | -0.0376<br>(0.0400)  | -0.0335<br>(0.0279) |
| Fem. Leader $\times$ Most  | -0.0889<br>(0.100)   | -0.0973<br>(0.0913) | -0.0903<br>(0.0673)  | 0.0185<br>(0.0704)   | -0.0803<br>(0.0770) | -0.0352<br>(0.0534)  | 0.0604<br>(0.0543)  | -0.0158<br>(0.0610)  | 0.0159<br>(0.0419)  |
| Fem. Leader $\times$ Least | -0.162*<br>(0.0863)  | -0.0980<br>(0.0873) | -0.125**<br>(0.0619) | -0.0146<br>(0.0656)  | -0.0779<br>(0.0727) | -0.0485<br>(0.0501)  | 0.00757<br>(0.0506) | -0.0679<br>(0.0589)  | -0.0336<br>(0.0400) |
| Round FE                   |                      |                     |                      | X                    | X                   | X                    | X                   | X                    | X                   |
| Practice round             | X                    | X                   | X                    | X                    | X                   | X                    | X                   | X                    | X                   |
| Sample FE                  |                      |                     | X                    |                      |                     | X                    |                     |                      | X                   |
| Observations               | 435                  | 575                 | 1010                 | 1305                 | 1725                | 3030                 | 4350                | 5750                 | 10100               |
| Most + F $\times$ Most     | 0.168                | 0.0348              | 0.0893               | 0.210                | 0.0539              | 0.118                | 0.0837              | -0.00232             | 0.0316              |
| P-val                      | 0.018                | 0.600               | 0.065                | 0.000                | 0.338               | 0.002                | 0.027               | 0.958                | 0.292               |
| Least + F $\times$ Least   | -0.0892              | -0.0698             | -0.0790              | -0.0448              | -0.116              | -0.0851              | -0.0183             | -0.105               | -0.0671             |
| P-val                      | 0.121                | 0.276               | 0.073                | 0.330                | 0.030               | 0.019                | 0.596               | 0.015                | 0.019               |

\*  $p < 0.10$ , \*\*  $p < 0.05$ , \*\*\*  $p < 0.01$ . Standard errors in parentheses, clustered at the individual level. Practice Round is an indicator for playing strategically in practice round. Round FE are fixed effects for each of the ten rounds played. Sample fixed effects are fixed effects reflecting whether the subject participated in the original experiment at UC Merced or the replication experiment on Amazon MTurk. UCM refers to the original sample at UC Merced, MTurk refers to the replication sample on Amazon MTurk, and All refers to both samples combined.

Table A8: Assertive Cheap Talk and Gender Gaps, Male Subjects Only

|                                | Round 1             |                     |                     | Round 1 to 3         |                      |                       | All Rounds          |                     |                     |
|--------------------------------|---------------------|---------------------|---------------------|----------------------|----------------------|-----------------------|---------------------|---------------------|---------------------|
|                                | (1)<br>UCM          | (2)<br>MTurk        | (3)<br>All          | (4)<br>UCM           | (5)<br>MTurk         | (6)<br>All            | (7)<br>UCM          | (8)<br>MTurk        | (9)<br>All          |
| Fem. Leader                    | -0.0768<br>(0.0899) | -0.0234<br>(0.0701) | -0.0464<br>(0.0552) | -0.0785<br>(0.0695)  | -0.0249<br>(0.0563)  | -0.0473<br>(0.0444)   | -0.0663<br>(0.0608) | -0.0425<br>(0.0493) | -0.0478<br>(0.0388) |
| Assertive                      | 0.122*<br>(0.0689)  | 0.0440<br>(0.0382)  | 0.0621*<br>(0.0333) | 0.150***<br>(0.0476) | 0.0728**<br>(0.0313) | 0.0886***<br>(0.0265) | 0.00121<br>(0.0423) | 0.0384<br>(0.0266)  | 0.0287<br>(0.0226)  |
| Fem. Leader $\times$ Assertive | 0.0430<br>(0.0864)  | 0.00909<br>(0.0545) | 0.0272<br>(0.0455)  | 0.0323<br>(0.0615)   | 0.0233<br>(0.0445)   | 0.0356<br>(0.0365)    | 0.0802<br>(0.0546)  | 0.0264<br>(0.0381)  | 0.0407<br>(0.0314)  |
| Round FE                       | X                   | X                   | X                   | X                    | X                    | X                     | X                   | X                   | X                   |
| Practice round                 | X                   | X                   | X                   | X                    | X                    | X                     | X                   | X                   | X                   |
| Sample FE                      |                     |                     |                     |                      |                      | X                     |                     |                     | X                   |
| Observations                   | 150                 | 354                 | 504                 | 450                  | 1062                 | 1512                  | 1500                | 3540                | 5040                |
| A + F $\times$ A               | 0.165               | 0.0531              | 0.0893              | 0.182                | 0.0961               | 0.124                 | 0.0814              | 0.0647              | 0.0693              |
| P-val                          | 0.002               | 0.171               | 0.004               | 0.000                | 0.002                | 0.000                 | 0.020               | 0.018               | 0.002               |

\*  $p < 0.10$ , \*\*  $p < 0.05$ , \*\*\*  $p < 0.01$ . Standard errors in parentheses, clustered at the individual level. Assertive is a variable ranging from 0 to 2, increasing in the assertiveness of the cheattalk. Practice Round is an indicator for playing strategically in practice round. Round FE are fixed effects for each of the ten rounds played. Sample fixed effects are fixed effects reflecting whether the subject participated in the original experiment at UC Merced or the replication experiment on Amazon MTurk. UCM refers to the original sample at UC Merced, MTurk refers to the replication sample on Amazon MTurk, and All refers to both samples combined. Observations include only male subjects.

Table A9: Assertive Cheap Talk and Willingness to Follow Advice: Controlling for Subject Characteristics

|                                | Round 1              |                      |                       | Round 1 to 3         |                       |                       | All Rounds          |                     |                     |
|--------------------------------|----------------------|----------------------|-----------------------|----------------------|-----------------------|-----------------------|---------------------|---------------------|---------------------|
|                                | (1)<br>UCM           | (2)<br>MTurk         | (3)<br>All            | (4)<br>UCM           | (5)<br>MTurk          | (6)<br>All            | (7)<br>UCM          | (8)<br>MTurk        | (9)<br>All          |
| Fem. Leader                    | -0.0946<br>(0.0609)  | -0.00297<br>(0.0562) | -0.0378<br>(0.0405)   | -0.0565<br>(0.0437)  | 0.00430<br>(0.0456)   | -0.0237<br>(0.0318)   | -0.0236<br>(0.0351) | -0.0509<br>(0.0363) | -0.0408<br>(0.0263) |
| Assertive                      | 0.0879**<br>(0.0396) | 0.0579*<br>(0.0304)  | 0.0699***<br>(0.0239) | 0.110***<br>(0.0251) | 0.0940***<br>(0.0249) | 0.0997***<br>(0.0180) | 0.0189<br>(0.0208)  | 0.0363*<br>(0.0200) | 0.0285*<br>(0.0150) |
| Fem. Leader $\times$ Assertive | 0.0452<br>(0.0519)   | -0.00279<br>(0.0438) | 0.0152<br>(0.0330)    | 0.0178<br>(0.0349)   | -0.00730<br>(0.0358)  | 0.00311<br>(0.0254)   | 0.0321<br>(0.0288)  | 0.0150<br>(0.0286)  | 0.0221<br>(0.0211)  |
| Covariates                     | X                    | X                    | X                     | X                    | X                     | X                     | X                   | X                   | X                   |
| Round FE                       | X                    | X                    | X                     | X                    | X                     | X                     | X                   | X                   | X                   |
| Practice round                 | X                    | X                    | X                     | X                    | X                     | X                     | X                   | X                   | X                   |
| Sample FE                      |                      |                      | X                     |                      |                       | X                     |                     |                     | X                   |
| Observations                   | 423                  | 569                  | 1001                  | 1269                 | 1707                  | 3003                  | 4230                | 5690                | 10010               |
| A + F $\times$ A               | 0.133                | 0.0551               | 0.0851                | 0.128                | 0.0867                | 0.103                 | 0.0510              | 0.0513              | 0.0506              |
| P-val                          | 0.000                | 0.082                | 0.000                 | 0.000                | 0.001                 | 0.000                 | 0.011               | 0.013               | 0.001               |

\*  $p < 0.10$ , \*\*  $p < 0.05$ , \*\*\*  $p < 0.01$ . Standard errors in parentheses, clustered at the individual level. Assertive is a variable ranging from 1 to 3, increasing in the assertiveness of the cheaptalk. Covariates include subject's gender and age, and team leader's pseudonym's perceived age, income, education, and indicators for each race. GPA and Education are included as covariates in UCM and MTurk sample, respectively. Practice Round is an indicator for playing strategically in practice round. Round FE are fixed effects for each of the ten rounds played. Sample fixed effects are fixed effects reflecting whether the subject participated in the original experiment at UC Merced or the replication experiment on Amazon MTurk. UCM refers to the original sample at UC Merced, MTurk refers to the replication sample on Amazon MTurk, and All refers to both samples combined.

Table A10: Subjective Evaluations of the Team Leader, Original Sample (UCM)

|                                      | (1)<br>Exp. Perf.   | (2)<br>Retained      | (3)<br>Eval.          | (4)<br>Recall        | (5)<br>Self-Power   | (6)<br>Selects       |
|--------------------------------------|---------------------|----------------------|-----------------------|----------------------|---------------------|----------------------|
| Fem. Leader                          | 0.510<br>(0.794)    | 0.00451<br>(0.0458)  | 0.0399<br>(0.0563)    | -0.149<br>(0.113)    | -0.149*<br>(0.0826) | 0.0817<br>(0.0711)   |
| Most Assertive                       | 0.361<br>(0.824)    | 0.0257<br>(0.0439)   | -0.0964<br>(0.0654)   | -0.502***<br>(0.140) | 0.0508<br>(0.0962)  | 0.0464<br>(0.0747)   |
| Least Assertive                      | -0.374<br>(0.774)   | 0.0120<br>(0.0457)   | -0.301***<br>(0.0713) | 0.272**<br>(0.106)   | 0.0999<br>(0.0935)  | 0.00633<br>(0.0763)  |
| Fem. Leader $\times$ Most Assertive  | -0.896<br>(1.172)   | -0.0354<br>(0.0631)  | 0.0585<br>(0.0907)    | 0.190<br>(0.201)     | 0.0707<br>(0.125)   | -0.0387<br>(0.0988)  |
| Fem. Leader $\times$ Least Assertive | -0.305<br>(1.124)   | 0.0139<br>(0.0615)   | 0.0227<br>(0.100)     | -0.00927<br>(0.165)  | 0.171<br>(0.123)    | -0.0496<br>(0.103)   |
| Constant (Male-Mod. Assertive)       | 10.18***<br>(0.518) | 0.915***<br>(0.0332) | 0.0117<br>(0.0409)    | 3.292***<br>(0.0684) | -0.0191<br>(0.0675) | 0.718***<br>(0.0538) |
| Observations                         | 431                 | 435                  | 435                   | 399                  | 435                 | 435                  |
| Most + F $\times$ Most               | -0.535              | -0.00974             | -0.0380               | -0.312               | 0.122               | 0.00769              |
| P-val                                | 0.521               | 0.830                | 0.546                 | 0.031                | 0.125               | 0.905                |
| Least + F $\times$ Least             | -0.680              | 0.0259               | -0.278                | 0.263                | 0.271               | -0.0432              |
| P-val                                | 0.404               | 0.529                | 0.000                 | 0.037                | 0.001               | 0.528                |

\*  $p < 0.10$ , \*\*  $p < 0.05$ , \*\*\*  $p < 0.01$ . Robust standard errors in parentheses. Dependent variables reflect the subject's assessment of the team leader. Exp. Perf subject's belief of the ventile of points earned by the team leader over all ten rounds in the Individual Game (Expected Leader Performance). Retained is an indicator for whether the subject kept the team leader (as opposed to getting a new team leader) for a final incentivized game (Retained Leader). Eval. is the summary index of 16 questions evaluating the team leader, increasing in positive evaluation (Leader Evaluation). Recall is the number of messages (of four) correctly identified as having received or not received from their team leader in the Individual Game (Message Recall). Self-Power: Summary index of 8 questions evaluating the subject's own feelings of power and control. Selects is an indicator for whether the subject selected the team leader to play an incentive logic game in which the subject gained earnings if the team leader performed well and lost earnings if the team leader performed poorly (Selects Leader for Risky Puzzle).

Table A11: Subjective Evaluations of the Team Leader, Replication Sample (Mturk)

|                                      | (1)<br>Exp. Perf.   | (2)<br>Retained      | (3)<br>Eval.          | (4)<br>Recall       | (5)<br>Self-Power  |
|--------------------------------------|---------------------|----------------------|-----------------------|---------------------|--------------------|
| Fem. Leader                          | 1.195<br>(0.734)    | 0.0286<br>(0.0422)   | 0.0302<br>(0.0626)    | 0.224<br>(0.144)    | -0.0204<br>(0.111) |
| Most Assertive                       | 0.277<br>(0.747)    | 0.00703<br>(0.0434)  | -0.143**<br>(0.0642)  | -0.247*<br>(0.146)  | -0.0499<br>(0.104) |
| Least Assertive                      | 0.900<br>(0.708)    | -0.0214<br>(0.0467)  | -0.338***<br>(0.0687) | 0.141<br>(0.154)    | -0.0739<br>(0.112) |
| Fem. Leader $\times$ Most Assertive  | -0.531<br>(1.019)   | -0.0150<br>(0.0582)  | 0.0311<br>(0.0907)    | -0.387*<br>(0.205)  | 0.0560<br>(0.148)  |
| Fem. Leader $\times$ Least Assertive | -2.383**<br>(1.008) | -0.0788<br>(0.0670)  | -0.0257<br>(0.100)    | -0.183<br>(0.210)   | -0.0339<br>(0.156) |
| Constant (Male-Neutral)              | 9.636***<br>(0.548) | 0.898***<br>(0.0325) | 0.209***<br>(0.0434)  | 2.818***<br>(0.107) | 0.0444<br>(0.0790) |
| Observations                         | 570                 | 575                  | 574                   | 575                 | 574                |
| Most + F $\times$ Most               | -0.254              | -0.00795             | -0.112                | -0.634              | 0.00611            |
| P-val                                | 0.714               | 0.837                | 0.081                 | 0.000               | 0.954              |
| Least + F $\times$ Least             | -1.483              | -0.100               | -0.364                | -0.0421             | -0.108             |
| P-val                                | 0.039               | 0.037                | 0.000                 | 0.769               | 0.322              |

\*  $p < 0.10$ , \*\*  $p < 0.05$ , \*\*\*  $p < 0.01$ . Robust standard errors in parentheses. Dependent variables reflect the subject's assessment of the team leader. Exp. Perf subject's belief of the ventile of points earned by the team leader over all ten rounds in the Individual Game (Expected Leader Performance). Retained is an indicator for whether the subject kept the team leader (as opposed to getting a new team leader) for a final incentivized game (Retained Leader). Eval. is the summary index of 16 questions evaluating the team leader, increasing in positive evaluation (Leader Evaluation). Recall is the number of messages (of four) correctly identified as having received or not received from their team leader in the Individual Game (Message Recall). Self-Power: Summary index of 8 questions evaluating the subject's own feelings of power and control. Selects is an indicator for whether the subject selected the team leader to play an incentive logic game in which the subject gained earnings if the team leader performed well and lost earnings if the team leader performed poorly (Selects Leader for Risky Puzzle).

Table A12: Underlying Evaluations, Part 1, Original Sample (UCM)

|                               | (1)               | (2)                 | (3)                 | (4)                | (5)                | (6)                | (7)                  | (8)                  |
|-------------------------------|-------------------|---------------------|---------------------|--------------------|--------------------|--------------------|----------------------|----------------------|
|                               | Col.              | Super               | Clear               | Earned             | Able               | Enjoy              | Confidence           | Convince             |
| Fem. Leader                   | -0.177<br>(0.173) | 0.00386<br>(0.180)  | -0.157<br>(0.191)   | -0.0972<br>(0.244) | -0.0905<br>(0.251) | -0.0687<br>(0.210) | 0.122**<br>(0.0560)  | 0.0402<br>(0.196)    |
| Most Assertive                | -0.207<br>(0.199) | -0.203<br>(0.213)   | -0.377<br>(0.232)   | -0.280<br>(0.273)  | -0.137<br>(0.254)  | -0.143<br>(0.215)  | 0.366***<br>(0.0770) | -0.173<br>(0.219)    |
| Fem. Leader × Most Assertive  | 0.471*<br>(0.254) | 0.212<br>(0.273)    | 0.223<br>(0.310)    | 0.420<br>(0.369)   | 0.251<br>(0.345)   | 0.148<br>(0.295)   | -0.0951<br>(0.105)   | 0.0401<br>(0.279)    |
| Least Assertive               | -0.205<br>(0.193) | -0.433**<br>(0.196) | -0.559**<br>(0.220) | -0.0682<br>(0.254) | -0.243<br>(0.260)  | -0.300<br>(0.216)  | -0.629***<br>(0.107) | -0.920***<br>(0.250) |
| Fem. Leader × Least Assertive | 0.421*<br>(0.255) | 0.0902<br>(0.274)   | -0.0384<br>(0.315)  | 0.0729<br>(0.351)  | -0.0547<br>(0.362) | 0.205<br>(0.286)   | -0.113<br>(0.137)    | -0.299<br>(0.334)    |
| Observations                  | 432               | 427                 | 422                 | 422                | 423                | 419                | 432                  | 435                  |
| Most + F × Most               | 0.264             | 0.00878             | -0.154              | 0.139              | 0.114              | 0.00512            | 0.271                | -0.133               |
| P-val                         | 0.095             | 0.959               | 0.455               | 0.574              | 0.626              | 0.980              | 0.000                | 0.445                |
| Least + F × Least             | 0.216             | -0.342              | -0.597              | 0.00476            | -0.298             | -0.0946            | -0.742               | -1.219               |
| P-val                         | 0.195             | 0.075               | 0.008               | 0.984              | 0.238              | 0.614              | 0.000                | 0.000                |

\*  $p < 0.10$ , \*\*  $p < 0.05$ , \*\*\*  $p < 0.01$ . Standard errors in parentheses, clustered at the individual level. Dependent variables refer to the first seven questions underlying the Leader Evaluation Summary Index. All measures increase in positive evaluations of the team leader. See Variable Appendix for definitions.

Table A13: Underlying Evaluations, Part 2, Original Sample (UCM)

|                               | (1)               | (2)                | (3)                | (4)                 | (5)                 | (6)                 | (7)                  | (8)                |
|-------------------------------|-------------------|--------------------|--------------------|---------------------|---------------------|---------------------|----------------------|--------------------|
|                               | Respect           | Approach           | Calm               | Teamwork            | Leadership          | Effective           | Exaggerate           | Interpersonal      |
| Fem. Leader                   | 0.113<br>(0.141)  | 0.0685<br>(0.217)  | 0.0610<br>(0.206)  | 0.132<br>(0.225)    | 0.0286<br>(0.205)   | -0.00190<br>(0.181) | -0.161<br>(0.266)    | -0.0757<br>(0.199) |
| Most Assertive                | -0.156<br>(0.177) | -0.229<br>(0.237)  | -0.0534<br>(0.221) | -0.282<br>(0.260)   | -0.116<br>(0.233)   | -0.0580<br>(0.190)  | -1.237***<br>(0.277) | 0.110<br>(0.227)   |
| Fem. Leader × Most Assertive  | -0.136<br>(0.227) | -0.0602<br>(0.322) | -0.203<br>(0.308)  | -0.239<br>(0.364)   | 0.131<br>(0.317)    | 0.0443<br>(0.273)   | 0.704*<br>(0.391)    | -0.0114<br>(0.299) |
| Least Assertive               | 0.0644<br>(0.162) | -0.0383<br>(0.231) | -0.185<br>(0.225)  | -0.00252<br>(0.238) | -0.600**<br>(0.237) | -0.434**<br>(0.219) | -0.341<br>(0.284)    | -0.404*<br>(0.222) |
| Fem. Leader × Least Assertive | -0.291<br>(0.221) | -0.0220<br>(0.318) | -0.116<br>(0.316)  | -0.270<br>(0.325)   | -0.202<br>(0.337)   | 0.0699<br>(0.297)   | 0.685*<br>(0.394)    | 0.0272<br>(0.300)  |
| Observations                  | 433               | 434                | 434                | 431                 | 434                 | 433                 | 431                  | 434                |
| Most + F × Most               | -0.292            | -0.290             | -0.256             | -0.521              | 0.0154              | -0.0137             | -0.533               | 0.0990             |
| P-val                         | 0.042             | 0.183              | 0.231              | 0.042               | 0.943               | 0.945               | 0.055                | 0.613              |
| Least + F × Least             | -0.226            | -0.0604            | -0.302             | -0.273              | -0.803              | -0.365              | 0.344                | -0.377             |
| P-val                         | 0.135             | 0.783              | 0.175              | 0.220               | 0.001               | 0.070               | 0.209                | 0.062              |

\*  $p < 0.10$ , \*\*  $p < 0.05$ , \*\*\*  $p < 0.01$ . Standard errors in parentheses, clustered at the individual level. Dependent variables refer to the first seven questions underlying the Leader Evaluation Summary Index. All measures increase in positive evaluations of the team leader. See Variable Appendix for definitions.

Table A14: Underlying Evaluations, Part 1, Replication Sample (MTurk)

|                               | (1)                | (2)                 | (3)                  | (4)               | (5)                | (6)                | (7)                   | (8)                  |
|-------------------------------|--------------------|---------------------|----------------------|-------------------|--------------------|--------------------|-----------------------|----------------------|
|                               | Col.               | Super               | Clear                | Earned            | Able               | Enjoy              | Confidence            | Convince             |
| Fem. Leader                   | 0.261*<br>(0.150)  | 0.158<br>(0.189)    | -0.101<br>(0.171)    | 0.0876<br>(0.210) | 0.116<br>(0.191)   | 0.128<br>(0.177)   | -0.0681<br>(0.0667)   | -0.0988<br>(0.160)   |
| Most Assertive                | 0.0661<br>(0.158)  | 0.0812<br>(0.174)   | -0.172<br>(0.151)    | -0.243<br>(0.226) | -0.0815<br>(0.191) | -0.119<br>(0.182)  | 0.0565<br>(0.0714)    | -0.105<br>(0.166)    |
| Fem. Leader × Most Assertive  | -0.0312<br>(0.220) | -0.00404<br>(0.252) | 0.0896<br>(0.241)    | 0.0713<br>(0.317) | 0.0815<br>(0.277)  | 0.0138<br>(0.261)  | 0.0465<br>(0.102)     | 0.194<br>(0.232)     |
| Least Assertive               | -0.120<br>(0.157)  | -0.363*<br>(0.191)  | -0.678***<br>(0.165) | -0.308<br>(0.215) | -0.362*<br>(0.189) | -0.155<br>(0.177)  | -0.741***<br>(0.0976) | -0.763***<br>(0.185) |
| Fem. Leader × Least Assertive | -0.164<br>(0.228)  | -0.118<br>(0.285)   | 0.445*<br>(0.247)    | -0.174<br>(0.331) | -0.0317<br>(0.300) | -0.0869<br>(0.268) | -0.0274<br>(0.149)    | -0.234<br>(0.291)    |
| Observations                  | 559                | 544                 | 531                  | 518               | 534                | 522                | 571                   | 560                  |
| Most + F × Most               | 0.0349             | 0.0771              | -0.0828              | -0.172            | -9.71e-17          | -0.106             | 0.103                 | 0.0888               |
| P-val                         | 0.820              | 0.671               | 0.660                | 0.439             | 1.000              | 0.572              | 0.159                 | 0.583                |
| Least + F × Least             | -0.284             | -0.480              | -0.234               | -0.481            | -0.394             | -0.242             | -0.768                | -0.997               |
| P-val                         | 0.088              | 0.024               | 0.205                | 0.056             | 0.091              | 0.230              | 0.000                 | 0.000                |

\*  $p < 0.10$ , \*\*  $p < 0.05$ , \*\*\*  $p < 0.01$ . Standard errors in parentheses, clustered at the individual level. Dependent variables refer to the first seven questions underlying the Leader Evaluation Summary Index. All measures increase in positive evaluations of the team leader. See Variable Appendix for definitions.

Table A15: Underlying Evaluations, Part 2, Replication Sample (MTurk)

|                                      | (1)                | (2)                | (3)                 | (4)                | (5)                  | (6)                  | (7)                | (8)                  |
|--------------------------------------|--------------------|--------------------|---------------------|--------------------|----------------------|----------------------|--------------------|----------------------|
|                                      | Respect            | Approach           | Calm                | Teamwork           | Leadership           | Effective            | Exaggerate         | Interpersonal        |
| Fem. Leader                          | -0.0983<br>(0.151) | 0.00445<br>(0.165) | 0.119<br>(0.164)    | -0.127<br>(0.198)  | 0.154<br>(0.165)     | 0.123<br>(0.149)     | 0.503*<br>(0.296)  | 0.0398<br>(0.173)    |
| Most Assertive                       | -0.257*<br>(0.153) | -0.234<br>(0.178)  | -0.186<br>(0.172)   | -0.192<br>(0.195)  | -0.0657<br>(0.167)   | -0.0789<br>(0.160)   | -0.567*<br>(0.303) | -0.206<br>(0.186)    |
| Fem. Leader $\times$ Most Assertive  | 0.319<br>(0.218)   | 0.279<br>(0.252)   | 0.0785<br>(0.234)   | 0.435<br>(0.277)   | 0.0791<br>(0.239)    | -0.0538<br>(0.227)   | -0.585<br>(0.425)  | 0.261<br>(0.262)     |
| Least Assertive                      | -0.132<br>(0.149)  | -0.104<br>(0.166)  | -0.445**<br>(0.183) | -0.211<br>(0.192)  | -0.662***<br>(0.190) | -0.483***<br>(0.159) | 0.239<br>(0.305)   | -0.694***<br>(0.191) |
| Fem. Leader $\times$ Least Assertive | 0.377*<br>(0.210)  | 0.237<br>(0.239)   | 0.102<br>(0.263)    | 0.00792<br>(0.290) | -0.158<br>(0.284)    | -0.187<br>(0.261)    | -0.509<br>(0.433)  | 0.106<br>(0.274)     |
| Observations                         | 547                | 549                | 554                 | 556                | 551                  | 542                  | 556                | 555                  |
| Most + F $\times$ Most               | 0.0622             | 0.0441             | -0.108              | 0.243              | 0.0134               | -0.133               | -1.152             | 0.0551               |
| P-val                                | 0.689              | 0.805              | 0.497               | 0.217              | 0.937                | 0.408                | 0.000              | 0.765                |
| Least + F $\times$ Least             | 0.245              | 0.133              | -0.342              | -0.203             | -0.820               | -0.670               | -0.270             | -0.588               |
| P-val                                | 0.097              | 0.440              | 0.069               | 0.351              | 0.000                | 0.001                | 0.379              | 0.003                |

\*  $p < 0.10$ , \*\*  $p < 0.05$ , \*\*\*  $p < 0.01$ . Standard errors in parentheses, clustered at the individual level. Dependent variables refer to the first seven questions underlying the Leader Evaluation Summary Index. All measures increase in positive evaluations of the team leader. See Variable Appendix for definitions.

Table A16: Following Advice Under Coordination

|                                      | (1)                   | (2)                  | (3)                |
|--------------------------------------|-----------------------|----------------------|--------------------|
|                                      | Strategic             | Strategic - R1       | Strategic - R10    |
| Fem. Leader                          | -0.000922<br>(0.0509) | -0.0805<br>(0.0789)  | 0.0240<br>(0.0723) |
| Most Assertive                       | -0.0173<br>(0.0508)   | -0.146*<br>(0.0787)  | 0.0119<br>(0.0712) |
| Least Assertive                      | -0.134**<br>(0.0581)  | -0.159*<br>(0.0851)  | -0.123<br>(0.0822) |
| Fem. Leader $\times$ Most Assertive  | -0.0282<br>(0.0736)   | 0.0815<br>(0.109)    | -0.0258<br>(0.104) |
| Fem. Leader $\times$ Least Assertive | 0.0640<br>(0.0805)    | 0.166<br>(0.114)     | 0.0946<br>(0.106)  |
| Constant(Neutral-Male)               | 0.873***<br>(0.0378)  | 0.672***<br>(0.0640) | 0.103*<br>(0.0588) |
| Practice round                       | X                     | X                    | X                  |
| Observations                         | 575                   | 575                  | 575                |
| Most + F $\times$ Most               | -0.0455               | -0.0649              | -0.0139            |
| P-val                                | 0.392                 | 0.386                | 0.853              |
| Least + F $\times$ Least             | -0.0699               | 0.00713              | -0.0285            |
| P-val                                | 0.206                 | 0.925                | 0.670              |

\*  $p < 0.10$ , \*\*  $p < 0.05$ , \*\*\*  $p < 0.01$ . Robust standard errors in parentheses. Practice Round is an indicator for playing strategically in practice round. Strategic is an indicator if the subject followed the team leader's advice (Strategic in Coordination). Strategic - R1 (Strategic - R10) is the difference between whether a subject followed the advice relative to if the subject followed the advice in Round 1 (Round 10) of the Individual Game (Strategic in Coordination - Strategic, R1(R10)).

Table A17: Following Assertive Advice by Subject Gender

|                              | Round 1              |                     |                       | All Rounds          |                       |                       |
|------------------------------|----------------------|---------------------|-----------------------|---------------------|-----------------------|-----------------------|
|                              | (1)                  | (2)                 | (3)                   | (4)                 | (5)                   | (6)                   |
|                              | UCM                  | MTurk               | All                   | UCM                 | MTurk                 | All                   |
| Fem. Subj                    | 0.0159<br>(0.0574)   | -0.0348<br>(0.0556) | -0.0274<br>(0.0398)   | 0.0558<br>(0.0362)  | 0.0792**<br>(0.0382)  | 0.0690***<br>(0.0262) |
| Assertive                    | 0.147***<br>(0.0426) | 0.0486*<br>(0.0271) | 0.0750***<br>(0.0229) | 0.0465*<br>(0.0271) | 0.0507***<br>(0.0190) | 0.0482***<br>(0.0158) |
| Fem. Subj $\times$ Assertive | -0.0525<br>(0.0527)  | 0.0152<br>(0.0454)  | 0.00411<br>(0.0331)   | -0.0163<br>(0.0318) | -0.0225<br>(0.0311)   | -0.0209<br>(0.0212)   |
| Round FE                     | X                    | X                   | X                     | X                   | X                     | X                     |
| Practice round               | X                    | X                   | X                     | X                   | X                     | X                     |
| Sample FE                    |                      |                     | X                     |                     |                       | X                     |
| Observations                 | 432                  | 569                 | 1001                  | 4320                | 5690                  | 10010                 |

\*  $p < 0.10$ , \*\*  $p < 0.05$ , \*\*\*  $p < 0.01$ . Standard errors in parentheses, clustered at the individual level. Fem. Subj. is an indicator for a female subject. Assertive is a variable ranging from 0 to 2, increasing in the assertiveness of the cheap talk. Practice Round is an indicator for playing strategically in practice round. Round FE are fixed effects for each of the ten rounds played. Sample fixed effects are fixed effects reflecting whether the subject participated in the original experiment at UC Merced or the replication experiment on Amazon MTurk. UCM refers to the original sample at UC Merced, MTurk refers to the replication sample on Amazon MTurk, and All refers to both samples combined.

Table A18: Performance on *Individual Game* by Subject Gender

|                | Strategic Play in Practice Round |                     |                      | Strategic Play in Round 1 to 10 |                     |                       |
|----------------|----------------------------------|---------------------|----------------------|---------------------------------|---------------------|-----------------------|
|                | (1)                              | (2)                 | (3)                  | (4)                             | (5)                 | (6)                   |
|                | UCM                              | MTurk               | All                  | UCM                             | MTurk               | All                   |
| Female Subject | 0.00865<br>(0.0279)              | -0.0205<br>(0.0211) | -0.00815<br>(0.0170) | 0.0451*<br>(0.0245)             | 0.0489*<br>(0.0251) | 0.0473***<br>(0.0178) |
| Round FE       |                                  |                     |                      | X                               | X                   | X                     |
| Sample FE      |                                  |                     | X                    |                                 |                     | X                     |
| Observations   | 432                              | 569                 | 1001                 | 4320                            | 5690                | 10010                 |

\*  $p < 0.10$ , \*\*  $p < 0.05$ , \*\*\*  $p < 0.01$ . Standard errors in parentheses clustered at the individual level. Strategic Play in Practice Round is an indicator for playing strategically in practice round prior to receiving any advice. Round FE are fixed effects for each of the ten rounds played. Sample fixed effects are fixed effects reflecting whether the subject participated in the original experiment at UC Merced or the replication experiment on Amazon MTurk. UCM refers to the original sample at UC Merced, MTurk refers to the replication sample on Amazon MTurk, and All refers to both samples combined.

# Leader Survey [UC Merced]

*Different pages in the online survey are indicated by -----  
Images are generally only displayed once and noted accordingly.*

Before we begin this experiment, we would like to confirm your consent to participate.

Consent Form: Link to form (posted at end of instrument)

-----  
If you wish to participate, please select the "I consent" button to continue to the research study. Otherwise, please select "I do not consent" and this session will terminate.

I consent

I do not consent

-----  
This is an experiment in the economics of decision making. The instructions are simple. If you follow them closely and make appropriate decisions, you may make an appreciable amount of money. At the end of the experiment, this will be paid to you, in cash, along with a \$5 participation fee.

The experiment will consist of three games. We will also ask to you answer a series of survey questions throughout.

-----  
This is the first game. You will play 20 rounds of this game. Each round will earn you points. After playing all 20 rounds, one of the rounds will be randomly selected and the points you earned in that round will be converted to a cash payout at an exchange rate of 100 points to 2 USD.

In addition, some subjects will be selected to be a Team Leader to future subjects. These future subjects will get to see how you played the game on selected rounds. If you are selected to be a Team Leader you will earn a bonus of \$2.76 to \$6.28 based on how future subjects perform in the game. Playing this game well is one criterion for whether you will be selected to be a Team Leader.

-----  
*[This payout figure is displayed on multiple pages of the survey. In the interest of legibility, we omit it from the remainder of the survey instrument. The Qualtrics link provided in the Online Appendix will allow you to observe when the payout figure is on display to the subject.]*

| <b>Player 1's Points (You)</b>                                      |                      |                      |                    |                      |                      |
|---------------------------------------------------------------------|----------------------|----------------------|--------------------|----------------------|----------------------|
| <b>Type A</b>                                                       |                      |                      | <b>Type B</b>      |                      |                      |
|                                                                     | If Player 2 selects: | If Player 2 selects: |                    | If Player 2 selects: | If Player 2 selects: |
|                                                                     | In                   | Out                  |                    | In                   | Out                  |
| If Type A selects:                                                  |                      |                      | If Type B selects: |                      |                      |
| 1                                                                   | 168                  | 444                  | 1                  | 276                  | 568                  |
| 2                                                                   | 150                  | 426                  | 2                  | 330                  | 606                  |
| 3                                                                   | 132                  | 408                  | 3                  | 352                  | 628                  |
| 4                                                                   | -188                 | -38                  | 4                  | 316                  | 592                  |
| Conversion rate: 100 Points=2 USD (e.g., 568 points=2*5.68=\$11.36) |                      |                      |                    |                      |                      |

| <b>Player 2's Points</b> |                        |                        |
|--------------------------|------------------------|------------------------|
|                          | If Player 1 is Type A: | If Player 1 is Type B: |
| If Player 2 selects In:  | 500                    | 200                    |
| If Player 2 selects Out: | 250                    | 250                    |

Here are the rules of the game. In this game, there are two participants: Player 1 (you) and Player 2. Your objective is to maximize your points, which will be converted to a cash payout (100 points = 2 USD).

**Player 1 (you):**

There are two types of Player 1: Type A and Type B. The table on the left, labeled “Player 1’s Points,” shows you the points earned for each type. For each round, you will decide what number you want to play. Player 2 will then look at that number, and decide if they want to play In or Out.

Your final points for each round is based on your type (A or B), the number you choose, and whether Player 2 plays In or Out. For example, if you are Type A and choose 1 and Player 2 plays In, you would earn 168, and if Player 2 plays Out, you would earn 444.

Notice that for each possible choice, regardless of your type, you are always better off if Player 2 chooses to play Out.

---

**Player 2:**

Player 2 is trying to maximize their points too. The table labeled “Player 2’s Points” shows the points earned by Player 2. For example, if you are type B and you choose 2, and Player 2 chooses In, you would earn 330 points and Player 2 would earn 200 points; if instead Player 2 chooses Out, you would earn 606 points and Player 2 would earn 250 points. Player 2 makes their choice, In or Out, after seeing the number chosen by Player 1. Player 2 does not know if they are playing against Type A or Type B – Player 2 only gets to see the number chosen by the Player 1.

Player 2 thinks that 50% of players are Type A and 50% of players are Type B. If Player 2 can guess correctly that they are playing with Type A, they earn more if they choose In than if they choose Out (500 versus 250). On the other hand, if Player 2 can guess correctly that they are playing with Type B, they earn more if they choose Out than if they choose In (250 versus 200).

---

**In our case, Player 2 is played by a computer that mimics real life players.** Though you are playing a computer, the computer has been programmed to mimic how real life university students have played this game as Player 2, and so the computer does not always respond in the same way to a given number.

**The computer only considers your choice in the current round when making its decision. It does not keep a record of your previous choices.** So, if the computer thinks it is playing against Type A in round 1, it won't assume it is playing against Type A in any other round - it does not know it is playing the same person for each round of the game.

**You will be Type B.** Remember, the computer doesn't see your type - it only sees the number you choose.

---

Please review the payout tables so you can see how your points and Player 2's points depend on your type, what you choose, and what the computer chooses as Player 2. Let's recap:

What are you trying to do? (Select all that are correct.)

- Earn the most points possible
- Earn the computer the most points
- Earn the fewest points possible
- Prefer not to respond

*Condition: If the incorrect answer is selected, the subject sees the following message: "No, your only goal is to maximize your payment. It doesn't matter what your computer earns. Try again." The subject cannot continue until they select the correct response.*

---

Yes, your only goal is to maximize your payout.

What is the computer trying to do? (Select all that are correct.)

- Earn the most points for itself
- Always play In
- Help you earn points
- Prefer not to respond

*Condition: If the incorrect answer is selected, the subject sees the following message: "No, the computer's only goal is to maximize its payout. IT doesn't care what you earn. Try again." The subject cannot continue until they select the correct response.*

---

Yes, the computer only cares to maximize its own points.

The computer's response is based on: (Select all that are correct.)

- How university students have previously played as Player 2
- Always plays In
- Learning from your choices in previous rounds
- Prefer not to respond

*Condition: If the incorrect answer is selected, the subject sees the following message: "No, the computer plays the same way university students have played this game as Player 2. It does not remember your previous response and cannot learn from round to round." The subject cannot continue until they select the correct response.*

---

Yes, the computer is programmed to imitate how real life university students have played this game as Player 2. It does not remember your previous responses and cannot learn from round to round.

---

We will now ask you a series of questions to ensure that you understood how points are earned in this game.

---

**Suppose you are a Type B Player 1.**

If you choose 3 and Player 2 chooses In, your points will be: \_\_\_\_\_. Player 2's points will be: \_\_\_\_\_

On the other hand, if you choose 4 and Player 2 chooses Out, your points will be: \_\_\_\_\_ Player 2's points will be: \_\_\_\_\_

---

**Suppose you are a Type B Player 1.**

If you choose 1 and Player 2 chooses Out, your points will be: \_\_\_\_\_ Player 2's points will be: \_\_\_\_\_

On the other hand, if you choose 2 and Player 2 chooses In, your points will be: \_\_\_\_\_ Player 2's points will be: \_\_\_\_\_

---

**Suppose you are a Type A Player 1.**

If you choose 2 and Player 2 chooses In, your points will be: \_\_\_\_\_ Player 2's points will be: \_\_\_\_\_

On the other hand, if you choose 3 and Player 2 chooses Out, your points will be: \_\_\_\_\_ Player 2's points will be: \_\_\_\_\_

---

Great, you understand the rules of the game. Let's pause here for a presentation on the game from the enumerator.

*At this stage in the experiment, the enumerator explains and confirms understanding of the signaling logic of the game. The enumerator then explains that the computer is programmed to respond probabilistically and shows the subject the expected value of each play.*

---

You can practice the game up to 10 times before playing the computer.

**What is your selection?**

- 1
- 2
- 3
- 4
- Prefer not to respond

---

You chose [ ], the computer played [ ], and you earned [ ] points for the round.

- I want to play another practice round
- I'm done practicing and am ready to play the game

*The above two pages repeats itself for up to ten times, unless the subject selects I'm done practicing and am ready to play the game. A random number generator selects what the computer plays using the probabilities described in the text. Based on the payout structure, the earned points are reported.*

---

### Round [1]

**What is your selection?**

- 1
- 2
- 3
- 4
- Prefer not to respond

*The number selected and points earned for each previous round is displayed.*

---

You chose [ ], the computer played [ ], and you earned [ ] points for the round.

*The above two pages repeats itself twenty times. A random number generator selects what the computer plays using the probabilities described in the text. Based on the payout structure, the earned points are reported.*

---

In addition to performing well, another selection criterion for being chosen to be Team Leader and earning a bonus is willingness to share messages that convince your team to play well in the game. Please see below a series of potential messages that could be sent to your team if you're selected as Team Leader. Part of future rounds in this study is to understand nuances in language, so many of the messages are similar with slight changes in the type of language used. Would you be willing to send these messages to your potential future team?

"I played 4. I am convinced that it is the best choice."

"I played 4. I am not sure whether it is a good choice."

"I played 4. Follow my lead and choose 4 too."

"I played 4, but I'm not an expert at this game."

"My decision was to play 4."

"I have figured out how to make good decisions in this experiment. Trust me, 4 is the best play."

"I might be missing something in choosing to play 4."

"When you play 4, Player 2 guesses you are Type B."

"I have extremely strong problem-solving skills and my advice can be an asset to you. When you play 4, Player 2 guesses you are Type B."

"You probably have better problem-solving skills than I do, but here is what I am thinking: When you play 4, Player 2 guesses you are Type B."

"Remember that Player 2 wants to play In when they think you are Type A and Out when they think you are Type B. So, you need to make Player 2 think you are Type B."

"My strengths include exceptional analytical thinking. Remember that Player 2 wants to play In when they think you are Type A and Out when they think you are Type B. So you need to make Player 2 think you are Type B."

"I am not sure, but it seems like Player 2 wants to play In when they think you are Type A and Out when they think you are Type B. So it might help to make Player 2 think you are Type B. Am I making sense?"

"When you play 4, Player 2 is more likely to think that you are Type B."

"I have earned the trust of my peers in the past, and I strongly encourage you to play 4."

"I don't know, but playing 4 seems like it's working."

"If you play 4, Player 2 is more likely to play Out, so you earn more."

"I pride myself on my ability to deliver, and I want you to succeed. I figured out that if you play 4, Player 2 is more likely to play Out, so you earn more. That is why I recommend you play 4."

"Sorry, I was just thinking that if you play 4, Player 2 might be more likely to play Out, so you might earn more. I'm not sure if that makes sense."

"You can make the computer think you are Type B by playing 4. If you play 3, then Player 2 cannot tell if you are A or B. That means that on average, you earn less when playing 3 because half the time you earn 352. But when you play 4, most times the Player 2 chooses Out and you earn 592. So, on average, you earn more when you play 4 because it signals to Player 2 that you must be Type B."

"I gravitate naturally to instruction, and I am keen to help you. The smart move is to play 4. See, you can make the computer think you are Type B by playing 4. If you play 3, then Player 2 cannot tell if you are A or B. That means that on average, you earn less when playing 3 because half the time you earn 352. But when you play 4, most times the Player 2 chooses Out and you earn 592. So on average, you earn more when you play 4 because it signals to Player 2 that you must be Type B."

"I don't know if this is helpful, but my thought is that maybe you can make the computer think you are Type B by playing 4. If you play 3, then Player 2 cannot tell if you are A or B. That means that on average, you earn less when playing 3 because half the time you earn 352. But when you play 4, most times the Player 2 chooses Out and you earn 592. So, on average, you earn more when you play 4 because it signals to Player 2 that you must be Type B."

- Yes, I would like to share these messages as a Team Leader with future potential subjects.
- No, I would not like to share these messages as a Team Leader with future potential subjects.
- Prefer not to respond

---

You have completed the first game. We will now move on to the second game.

For this second game, you will be asked to solve a math problem. You will have 60 seconds. If you solve it correctly, \$1 will be added to your compensation.

---

Please solve  $18084 \div 137$ : \_\_\_\_\_

---

Let's move on to the final game.

Here are the rules of the final game: You will observe a grid of symbols, in which one of the symbols is missing. Your task is to choose which of the options best fits the missing symbol. You have 60 seconds to make your selection. If you choose correctly, \$1 will be added to your compensation.

---

This is the final game. Which option best fits the missing symbol?

Here is a hint: One of the patterns is that from left to right, the panel in the foreground moves one place to the left each time. This pattern continues to the next row.

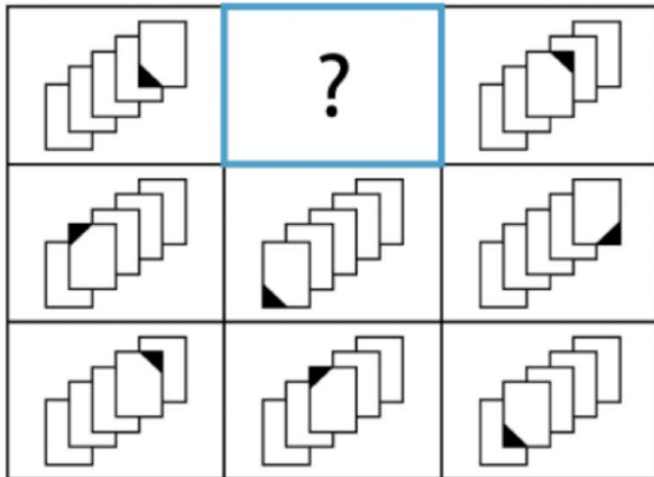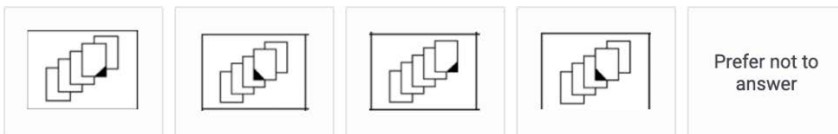

Would you be willing to provide the following advice to future team members if you're selected as Team Leader: "One of the patterns is that from left to right, the panel in the foreground moves one place to the left each time. This pattern continues to the next row."

- Yes
  - No
  - Prefer not to respond
- 

We would like to ask some final questions about you:

What is your gender?

- Female
  - Male
  - Other
  - Prefer not to respond
- 

What is your age? \_\_\_\_\_

---

What is your major? \_\_\_\_\_

---

What year are you at the university (e.g., 1st year, 2nd year, etc.)?

- 1st
- 2nd
- 3rd
- 4th
- 5th
- 6th or more
- Prefer not to respond

-----  
What is your e-mail ID (required to receive bonus if you are selected to be a Team Leader)? \_\_\_\_\_  
-----

-----  
A random number generator will select which round will determine your payment:  
-----

As a reminder, here are your results for Game 1.

| Round        | Number Chosen | Points Earned |
|--------------|---------------|---------------|
| 1            |               |               |
| 2            |               |               |
| 3            |               |               |
| 4            |               |               |
| 5            |               |               |
| 6            |               |               |
| 7            |               |               |
| 8            |               |               |
| 9            |               |               |
| 10           |               |               |
| 11           |               |               |
| 12           |               |               |
| 13           |               |               |
| 14           |               |               |
| 15           |               |               |
| 16           |               |               |
| 17           |               |               |
| 18           |               |               |
| 19           |               |               |
| 20           |               |               |
| <b>Total</b> |               |               |

*The columns are completed based on the subject's choice and earnings for each round.*

You will be paid for Round [ ]. This earns you USD [ ].

You earned an additional [ ] for game 2.

You earned an additional [ ] for game 3.

---

If you are selected to be a team leader, we will notify you through e-mail to give you your bonus after future subjects play the game.

Your total earnings, including the \$5 participation payment, is USD **XX**.

This concludes the experiment. Let your enumerator know your email ID and the enumerator will provide you the amount owed.

We are conducting this experiment with others in the University, so we would appreciate it if you refrain from discussing the experiment until August 15 with other students. Thank you for your participation.

---

We thank you for your time spent taking this survey. Your response has been recorded.

Title of Study: **Understanding Factors in Completing Tasks**

**Purpose and Background**

You are invited to participate in a research study to understand factors that influence how individuals make decisions to complete tasks. This study is being conducted by Ketki Sheth of the University of California at Merced, and Shanthi Manian of Washington State University.

Before you decide to participate in this study, it is important that you understand why the research is being done and what it will involve. Please take time to read the following information carefully. Please ask the researchers if there is anything that is not clear, or if you need more information.

Your participation in this experiment will provide a greater understanding of how tasks are completed.

**Study Procedure**

If you agree to participate in this study, we will ask you to participate in an experiment that will take approximately 1 hour. The experiment will take place on a computer and will be comprised of answering survey questions and playing a simple computer game.

**Risks**

We do not anticipate any risks to you participating in this study other than those encountered in day-to-day life.

**Benefits**

There are no direct benefits to you for your participation in this study.

**Compensation**

There is monetary compensation between \$10.52 to \$25.84 for you in exchange for your time and participation in the study. The compensation will depend on how you and others perform in the experiment.

**Subject Withdrawal**

You may decide to stop participation in this study at any time. You do not have to answer all of the questions. You may withdraw from the study at any time. Please inform the research investigator if you decide to withdraw.

## Consent to Participate in a Research Study

You may be withdrawn from the study without your consent if the researchers believe it is in your best interest, or if you fail to follow study procedures.

The investigators may, in their absolute discretion, terminate the study at any time.

### **Alternatives**

There are no alternatives to this procedure other than exercising your option to refuse to participate or to stop participation at any time.

### **Confidentiality**

Every effort will be made by the researcher to preserve your confidentiality including the following:

- Assigning code numbers for participants that will be used on all researcher notes and documents.
- Participant data will be kept confidential and be de-identified.
- All responses will be stored electronically using password protections.

While we will maintain confidentiality, we do plan on sharing your responses in the experiment and demographic characteristics (e.g., gender, age) with other subjects. This information will be de-identified and other subjects will not know that the responses or characteristics are connected to you. When providing any response we intend to share, you will be notified and asked again for your consent to share the response with others. If you do not want that information shared, you will have the option to refuse to share the response.

Absolute confidentiality cannot be guaranteed, since research documents are not protected from subpoena.

### **Questions**

If you have any questions or concerns relating to this study in the future, you may contact Shanthi Manian at [shanthi.manian@wsu.edu](mailto:shanthi.manian@wsu.edu) or Ketki Sheth at [ksheth@ucmerced.edu](mailto:ksheth@ucmerced.edu).

For questions about your rights while taking part in this study, call the Office of Research at (209) 383-8655 or write to the Office of Research, 5200 North Lake Rd, UC Merced, Merced, California 95343. The Office of Research will inform the Institutional Review Board which is a group of people who review the research to protect your rights. If you have any complaints or concerns about this study, you may address them to Ramesh Balasubramaniam, Chair of the IRB, at (209) 383-8655, [irbchair@ucmerced.edu](mailto:irbchair@ucmerced.edu).

## **Consent**

Your participation in this study is voluntary. It is up to you to decide whether or not to take part in this study.

If you do decide to take part in this study, you will be asked to consent. You are free to not answer any question or questions if you choose.

By selecting to consent:

- You confirm that you have read and understand the information and have had the opportunity to ask questions.
- You understand that your participation is voluntary and that you are free to withdraw at any time, without giving a reason and without cost.
- You voluntarily agree to take part in this study.
- You are over the age of 18.
- You have been given the option to receive a copy of this consent form.

**PARTICIPATION IN RESEARCH IS VOLUNTARY.** You have the right to decline to participate or to withdraw at any point in this study without jeopardy.

If you wish to participate, please select the “I consent” button to continue the research study. Otherwise, please select “I do not consent” and this session will terminate.

# Subject Survey [Replication on Amazon MTurk]

*Different pages in the online survey are indicated by -----  
Images are generally only displayed once and noted accordingly.*

This is an experiment in the economics of decision making. The instructions are simple. If you follow them closely and make appropriate decisions, you may earn a **bonus between \$.38 and \$6.24** (the average bonus has been \$2.86). This will be paid to you along with **\$2.50 for completing the experiment.**

The experiment will consist of three games. We will also ask you to answer a series of survey questions throughout.

**This survey must be completed in one sitting.** If you attempt the survey more than once, you will not be paid for any attempts after the first try, even if you did not complete the first attempt.

If you began this survey when it was still available as a HIT, but completed it after the HIT is unavailable: Message the requester (or email UCMercedEconomicsExperiment@gmail.com with the subject PROBLEM) with your **MTurk Worker ID and the survey completion code**. We will still compensate you after verifying that you started the survey when the HIT was available and completed it within 90 minutes.

Before we begin this experiment, we would like to confirm your consent to participate.

Consent Form: Link to form (posted at end of instrument)

If you wish to participate, please select the "I consent" button to continue to the research study. Otherwise, please select "I do not consent" and this session will terminate.

I consent

I do not consent

-----  
Thank you for agreeing to participate in our study.

Please provide your MTurk Worker ID so we can ensure payment to your account: \_\_\_\_\_

-----  
For the first game, you will play 10 rounds. Each round will earn you points. After playing all 10 rounds, one of the rounds will be randomly selected, and the points you earned in that round will be converted to a cash payout. **The more points you earn, the higher your bonus.**

The cash bonus is the number of points divided by 2 less \$1.00. For example, if you earned 425 points, you would earn  $\$4.25/2 - \$1.00 = \$2.13 - \$1.00 = \$1.13$ .

[This payout figure is displayed on multiple pages of the survey. In the interest of legibility, we omit it from the remainder of the survey instrument. The Qualtrics link provided in the Online Appendix will allow you to observe when the payout figure is on display to the subject.]

| <b>Player 1's Points (You)</b>                                                                                         |                               |                               |                           |                             |                             |
|------------------------------------------------------------------------------------------------------------------------|-------------------------------|-------------------------------|---------------------------|-----------------------------|-----------------------------|
| <b>Type A</b>                                                                                                          |                               |                               | <b>Type B</b>             |                             |                             |
|                                                                                                                        | <b>If Player 2 selects:</b>   | <b>If Player 2 selects:</b>   |                           | <b>If Player 2 selects:</b> | <b>If Player 2 selects:</b> |
|                                                                                                                        | <b>Left</b>                   | <b>Right</b>                  |                           | <b>Left</b>                 | <b>Right</b>                |
| <b>If Type A selects:</b>                                                                                              | <b>168</b>                    | <b>444</b>                    | <b>If Type B selects:</b> | <b>276</b>                  | <b>568</b>                  |
| <b>1</b>                                                                                                               |                               |                               | <b>1</b>                  |                             |                             |
| <b>2</b>                                                                                                               | <b>150</b>                    | <b>426</b>                    | <b>2</b>                  | <b>330</b>                  | <b>606</b>                  |
| <b>3</b>                                                                                                               | <b>132</b>                    | <b>408</b>                    | <b>3</b>                  | <b>352</b>                  | <b>628</b>                  |
| <b>4</b>                                                                                                               | <b>-188</b>                   | <b>-38</b>                    | <b>4</b>                  | <b>316</b>                  | <b>592</b>                  |
| Conversion of points to Payment: $\text{points}/2 - \$1.00$ (e.g., $568 \text{ points} = \$5.68/2 - \$1.00 = \$1.84$ ) |                               |                               |                           |                             |                             |
| <b>Player 2's Points</b>                                                                                               |                               |                               |                           |                             |                             |
|                                                                                                                        | <b>If Player 1 is Type A:</b> | <b>If Player 1 is Type B:</b> |                           |                             |                             |
| <b>If Player 2 selects Left</b>                                                                                        | <b>500</b>                    | <b>200</b>                    |                           |                             |                             |
| <b>If Player 2 selects Right</b>                                                                                       | <b>250</b>                    | <b>250</b>                    |                           |                             |                             |

Here are the rules of the first game. In this game, there are two participants: Player 1 (you) and Player 2. **Your objective is to maximize your points**, which will be converted to a cash payout. The more points you earn, the higher your bonus amount. The bonus is determined by dividing by 2 and subtracting \$1.00 from your total points (e.g.,  $425 \text{ points} = \$4.25/2 - \$1.00 = \$1.13$ ).

**Player 1 (you):**

There are two types of Player 1: Type A and Type B. The table on the left, labeled "Player 1's Points," shows you the points earned for each type. For each round, you will decide what you

want to play. Player 2 will then look at that direction, and decide if they want to play Left or Right.

Your final points for each round are based on your type (A or B), the direction you choose, and whether Player 2 plays Left or Right. For example, if you are Type A and choose 1, and player 2 plays Left, you would earn 168, and if Player 2 plays Right, you would earn 444.

Notice that for each possible choice, regardless of your type, you are always better off if Player 2 chooses to play Right.

---

### **Player 2:**

Player 2 is trying to maximize their points too. The table labeled "Player 2's Points" shows the points earned by Player 2. For example, if you are type B and you choose 2, and Player 2 chooses Left you would earn 330 points and Player 2 would earn 200 points; if instead Player 2 chooses Right, you would earn 606 points and Player 2 would earn 250 points.

Player 2 makes their choice, Left or Right, after seeing the direction chosen by Player 1. Player 2 does not know if they are playing against Type A or Type B. Player 2 only gets to see the direction chosen by Player 1.

Player 2 thinks that 50% of players are Type A and 50% of players are Type B. If Player 2 can guess correctly that they are playing with Type A, they earn more if they choose Left than if they choose Right (500 versus 250). On the other hand, if Player 2 can guess correctly that they are playing with Type B, they earn more if they choose Right than if they choose Left (250 versus 200).

---

**You will be Type B. Remember, Player 2 doesn't see your type - Player 2 only sees the direction you choose**

**In our case, Player 2 is played by a computer that mimics real life players.** Though you are playing a computer, the computer has been programmed to mimic how real life university students have played this game as Player 2, and so the computer does not always respond in the same way to a given number.

**The computer only considers your choice in the current round when making its decision. It does not keep a record of your previous choices.** So, if the computer thinks it is playing against Type A in round 1, it won't assume it is playing against Type A in any other round - it does not know it is playing the same person for each round of the game.

---

Please review the payout tables so you can see how your points and Player 2's points depend on your type, what you choose, and what the computer chooses as Player 2.

Let's recap:

What are you trying to do? (Select all that are correct.)

- Earn the most points possible
- Earn the computer the most points
- Earn the fewest points possible

*Condition: If the incorrect answer is selected, the subject sees the following message: "No, your only goal is to maximize your payment. It doesn't matter what your computer earns. Try again." The subject cannot continue until they select the correct response.*

---

Yes, your only goal is to maximize your payout.

What is the computer trying to do? (Select all that are correct.)

- Earn the most points for itself
- Always play Left
- Help you earn points

*Condition: If the incorrect answer is selected, the subject sees the following message: "No, the computer's only goal is to maximize its payout. It doesn't care what you earn. Try again." The subject cannot continue until they select the correct response.*

---

Yes, the computer only cares to maximize its own points.

The computer's response is based on: (Select all that are correct.)

- Always plays Left
- Learning from your choices in previous rounds
- How university students have previously played as Player 2

*Condition: If the incorrect answer is selected, the subject sees the following message: "No, the computer plays the same way university students have played this game as Player 2. It does not remember your previous responses and cannot learn from round to round. Try again." The subject cannot continue until they select the correct response.*

-----

Yes, the computer is programmed to imitate how real life university students have played this game as Player 2. It does not remember your previous responses and cannot learn from round to round.

-----

We will now ask you a series of questions to ensure that you understood how points are earned in this game.

-----

**Suppose you are a Type B Player 1.**

If you choose 3 and Player 2 chooses Left, your points will be: \_\_\_\_\_. Player 2's points will be: \_\_\_\_\_

On the other hand, if you choose 4 and Player 2 chooses Right, your points will be: \_\_\_\_\_ Player 2's points will be: \_\_\_\_\_

*Condition: The survey does not continue until the subject inputs the correct points earned.*

-----

**Suppose you are a Type B Player 1.**

If you choose 1 and Player 2 chooses Right, your points will be: \_\_\_\_\_. Player 2's points will be: \_\_\_\_\_

On the other hand, if you choose 2 and Player 2 chooses Left, your points will be: \_\_\_\_\_ Player 2's points will be: \_\_\_\_\_

*Condition: The survey does not continue until the subject inputs the correct points earned.*

---

**Suppose you are a Type A Player 1.**

If you choose 2 and Player 2 chooses Left, your points will be: \_\_\_\_\_ Player 2's points will be: \_\_\_\_\_

On the other hand, if you choose 3 and Player 2 chooses Right, your points will be: \_\_\_\_\_ Player 2's points will be: \_\_\_\_\_

*Condition: The survey does not continue until the subject inputs the correct points earned.*

---

Great, you understand the rules of the game.

In this game, we have paired you with a student from Washington State University who will be your Team Leader. The Team Leader's role is to provide advice to you during this game.

The Team Leader can offer advice to you by showing you how they played in each round and sending you messages. Just like you, the Team Leader is a Type B Player 1.

The Team Leader may give you advice, but you both make individual choices. So your payout will be based only on your decision, NOT on the decisions made by your Team Leader.

In contrast, the Team Leader is compensated both on how well they play the game AND based on how well their team plays the game, of which you are one team member.

This experiment was conducted from March 26th to March 30th and July 1st to July 30th, 2018, at Washington State University, from which we selected some students to be the Team Leaders for this study in which you are currently participating. To keep identities anonymous, we use pseudonyms for all Team Leaders. All other information about Team Leaders is an accurate reflection of the person.

---

Meet your Team Leader, [pseudonym].

*Introduction differs by randomized gender and message. Gender pseudonym and description are randomly selected based on randomly assigned gender.*

*[Avatars are displayed each time a team leader provides a message. The message is provided in a speech bubble.]*

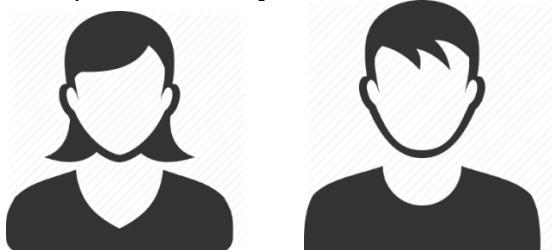

One of the below messages is selected, based on random assignment to message language. Message appear in a voice bubble with a gendered avatar

*Most Assertive:* Hi. My name is [pseudonym], and I am your Team Leader. I am 21 years old, [randomized gender], and an upper level student at Washington State University. My academic integrity and work experience have given me the essential skills to excel as a leader. If you listen to my advice, I can assure you that my skills and experiences will help you perform well in this game. I am looking forward to playing with you in this experiment.

*Moderately Assertive:* Hi. My name is [pseudonym], and I am your Team Leader. I am 21 years old, [randomized gender], and an upper level student at Washington State University. I am looking forward to playing with you in this experiment.

*Least Assertive:* Hi. My name is [Randomly selected gendered pseudonym], and I am your Team Leader. I am 21 years old, [gender], and an upper level student at Washington State University. I am not sure how good a leader I will be, but I am looking forward to playing with you in this experiment

---

### **Bonus Payment**

Before we start the game, we want you to **guess how Pseudonym will perform** on the game over all 10 rounds.

Pseudonym could earn anywhere between 2,760 and 6,280 total points over 10 rounds of the game. We have divided this range into 20 even bins, shown below. We will ask you to choose how many total points you guess Pseudonym earns. Depending on the accuracy of your guess, we will give you a bonus payment according to the table below.

| <b>Difference between your guess and your Team Leader' actual points earned</b> | <b>Earnings for your guess</b> |
|---------------------------------------------------------------------------------|--------------------------------|
| 0 bins away (exact answer)                                                      | \$1.00                         |
| 1 bin away                                                                      | \$0.94                         |
| 2 bins away                                                                     | \$0.75                         |
| 3 bins away                                                                     | \$0.44                         |
| 4 bins away or more                                                             | \$0.00                         |

- Bin 1: 2,760 - 2,936
  - Bin 2: 2,936 - 3,112
  - Bin 3: 3,112 - 3,288
  - Bin 4: 3,288 - 3,464
  - Bin 5: 3,464 - 3,640
  - Bin 6: 3,640 - 3,816
  - Bin 7: 3,816 - 3,992
  - Bin 8: 3,992 - 4,168
  - Bin 9: 4,168 - 4,344
  - Bin 10: 4,344 - 4,520
  - Bin 11: 4,520 - 4,696
  - Bin 12: 4,696 - 4,872
  - Bin 13: 4,872 - 5,048
  - Bin 14: 5,048 - 5,224
  - Bin 15: 5,224 - 5,400
  - Bin 16: 5,400 - 5,576
  - Bin 17: 5,576 - 5,752
  - Bin 18: 5,752 - 5,928
  - Bin 19: 5,928 - 6,104
  - Bin 20: 6,104 - 6,280
  - Prefer not to answer (\$0.00 earned)
-

Please consider what number you expect to play in the first round, then enter it below. This decision is not yet binding. You are not actually playing this number: you will not earn any money based on this decision.

- 1
  - 2
  - 3
  - 4
  - Prefer not to respond (0 points)
- 

You chose [ ], the computer played [ ], and you earned [ ] points for the round.

*A random number generator selects the computer's play using the probabilities described in the text. Based on the payout structure, the earned points are reported.*

---

Before you submit your actual play to the computer for each round, you will observe how Pseudonym has played, what the computer selected as Player 2 in response, and Pseudonym's points earned. You may also receive a note from Pseudonym with an additional message. After you receive this information, you will have 30 seconds to make your decision. This will repeat itself 10 times.

*Message per round differs by randomized gender and language style. Messages appear in a voice bubble with a gendered avatar (depicted above).*

**Round 1:**

*Most Assertive:* I played 4. I am convinced that it's the best choice.

*Moderately Assertive:* I played 4

*Least Assertive:* I played 4. I am not sure whether it is a good choice.

---

**Round 1**

**What is your selection?**

- 1
- 2
- 3
- 4
- Prefer not to respond (0 points)

*\* Compensation Structure, subject's previous rounds choices and outcomes, and team leader's previous rounds choices, outcomes, and messages are displayed.*

-----  
 You chose [ ], the computer played [ ], and you earned [ ] points for the round.

*A random number generator selects the computer's play using the probabilities described in the text. Based on the payout structure, the earned points are reported.*

-----  
*The above three pages are repeated nine more times. Below are the different messages for each round by language treatment. The team leader always plays 4 and earns 592 points.*

*Most assertive:*

Round 2: I played 4. Follow my lead and choose Blue too.

Round 3: I have figured out how to make good decisions in this experiment. Trust me, 4 is the best play.

Round 4: I have extremely strong problem-solving skills and my advice can be an asset to you. When you play 4, Player 2 guesses you are Type B.

Round 5: My strengths include exceptional analytical thinking. Remember that Player 2 wants to play Left when they think you are Type A and Right when they think you are Type B. So you need to make Player 2 think you are Type B.

Round 6: I have earned the trust of my peers in the past, and I strongly encourage you to play 4.

Round 7: I pride myself on my ability to deliver, and I want you to succeed. I figured out that if you play 4, Player 2 is more likely to play Right, so you earn more. That's why I recommend you play 4.

Round 8: I gravitate naturally to instruction, and I am keen to help you. The smart move is to play 4. See, you can make the computer think you are Type B by playing 4. If you play 3, then Player 2 can't tell if you are A or B. That means that on average, you earn less when playing 3 because half the time you earn 352. But when you play 4, most times the Player 2 chooses Right and you earn 592. So on average, you earn more when you play 4 because it signals to Player 2 that you must be Type B.

*Moderately Assertive:*

Round 2: I played 4.

Round 3: My decision was to play 4.

Round 4: When you play 4, Player 2 guesses you are Type B.

Round 5: Remember that Player 2 wants to play Left when they think you are Type A and Right when they think you are Type B. So you need to make Player 2 think you are Type B.

Round 6: When you play 4, Player 2 is more likely to think that you are Type B.

Round 7: If you play 4, Player 2 is more likely to play Right, so you earn more.

Round 8: You can make the computer think you are Type B by playing 4. If you play 3, then Player 2 can't tell if you are A or B. That means that on average, you earn less when playing 3 because half the time you earn 352. But when you play 4, most times the Player 2 chooses Right and you earn 592. So on average, you earn more when you play 4 because it signals to Player 2 that you must be Type B.

*Least Assertive:*

Round 2: I played 4, but I'm not an expert at this game.

Round 3: I might be missing something in choosing to play 4.

Round 4: You probably have better problem-solving skills than I do, but here is what I am thinking: When you play 4, Player 2 guesses you are Type B.

Round 5: I am not sure, but it seems like Player 2 wants to play Left when they think you are Type A and Right when they think you are Type B. So it might help to make Player 2 think you are Type B. Am I making sense?

Round 6: I don't know, but playing 4 seems like it's working.

Round 7: Sorry, but I was just thinking that if you play 4, Player 2 might be more likely to play Right, so you might earn more. I'm not sure if that makes sense.

Round 8: I don't know if this is helpful, but my thought is that maybe you can make the computer think you are Type B by playing 4. If you play 3, then Player 2 cannot tell if you are A or B. That means that on average, you earn less when playing 3 because half the time you earn 352. But when you play 4, most times the Player 2 chooses Right and you earn 592. So on average, you earn more when you play 4 because it signals to Player 2 that you must be Type B.

---

You have completed the first game. We will now move on to the second game.

For this next game, you will be partnered with another person on MTurk to form a team. You will continue to play against Player 2 (played by a computer). Pseudonym will continue to be your team leader and give you advice. Your bonus payment in this game will be based on what you select **and** the choice your teammate makes.

This is the first game your teammate is playing –**unlike you, your teammate did not play the first game**. Your teammate starts the experiment with this game and is given the same information as you from this point forward. As a result, some information may be repeated to you, but is new to your teammate.

Your teammate will be introduced to Pseudonym as you were in the first game. You and your teammate will all see the same messages from Pseudonym and the same directions for this game.

In this game, each point you earn is equal to a one cent cash bonus. For example, if your team earned 150 points, you would earn \$1.50 as a bonus payment. As before, **the more points you earn, the higher your bonus**.

Click the arrow to learn the directions to the second game.

[This payout figure is displayed on multiple pages of the survey. In the interest of legibility, we omit it from the remainder of the survey instrument. The Qualtrics link provided in the Online Appendix will allow you to observe when the payout figure is on display to the subject.]

**The Set Up:**

| Band's Points (Your points)          |                        |                             |
|--------------------------------------|------------------------|-----------------------------|
|                                      | Player 2<br>Stays Home | Player 2<br>Attends Concert |
| Rock Band: All choose original Music | 50                     | 150                         |
| Rock Band: All choose Covers         | 75                     | 200                         |
| Rock Band: No Agreement              | 0                      | 0                           |
|                                      |                        |                             |
| Pop Band: All choose original Music  | 50                     | 75                          |
| Pop Band: All choose Covers          | 100                    | 125                         |
| Pop Band: No Agreement               | 0                      | 0                           |
| Conversion point payments, 100=\$1   |                        |                             |

| Plyer 2's points |                        |                             |
|------------------|------------------------|-----------------------------|
|                  | Player 2<br>Stays Home | Player 2<br>Attends Concert |
| Rock Band        | 100                    | 200                         |
| Pop Band         | 100                    | 50                          |
| No Concert       | 0                      | 0                           |

You and your teammate belong to a band and are planning to host a concert.

Your band has invited Player 2 to your concert. All bands prefer if Player 2 decides to come to their concert.

Player 2 would enjoy a concert by a Rock band, but would rather stay home for a concert performed by a Pop band. Many bands hold concerts and Player 2 cannot determine what type of band you are. Instead, Player 2 can observe whether you plan to play *Original Music* or *Covers* before deciding whether to go to the concert or stay home.

Your band's points are based on the table to the right: the points are based on the type of band you are (**Rock or Pop**), the music you choose to play (**Original Music or Covers**), the music your teammate chooses to play (**Original Music or Covers**), and the **decision by Player 2** on whether to attend the concert or stay home.

Your and your teammate's **objective is to maximize your points**, which will be converted to a bonus cash payment. Each point you earn is equal to a one cent cash bonus (e.g., 150 points = \$1.50 bonus payment).

**Player 2's Decision:**

Player 2 is trying to maximize their points too. The points received by Player 2 is shown to the right. Player 2 prefers to stay home for Pop bands, and prefers to attend the concert for Rock bands.

Player 2 thinks that half the bands are Rock bands and half the bands are Pop bands. Remember, Player 2 does not know what type of band you are, but will find out whether *Original Music* or *Covers* will be played at the concert.

### **Music Selection: What Player 2 Observes**

In this game, you and your teammate will simultaneously decide which music to play at the concert: *Original Music* or *Covers*.

If you and your teammate **BOTH** choose to play *Original Music*, Player 2 will observe that the band is playing "*Original Music*". If you and your teammate **BOTH** choose to play *Covers*, Player 2 will observe that the band is playing "*Covers*". However, if you and your teammate select differently (one chooses *Covers* and the other chooses *Original Music*), this means your band cannot finalize the set list and the concert will be cancelled. This brings the game to an end, and you and your teammate earn 0 points.

---

In this game, you and your teammate will be a **Rock band**. Remember, Player 2 does not see what type of band you are, only whether you and your teammate decided to play *Original Music* or *Covers* (if you agree on a music type).

In this game, Player 2 is played by a computer that mimics real life players. Though you are playing a computer, the computer has been programmed to mimic how real life university students have played similar games.

### **Summary of steps:**

1. You and your teammate will each simultaneously make your own choice of Original Music or Covers. That is, you cannot observe your teammate's choice before making your choice.
2. *If you and your teammate choose the same music:* Player 2 sees your team's consensus selection *Original Music* or *Covers*). *If you and your teammate choose different music:* the concert is cancelled, you earn no bonus, and the game ends.
3. *If you and your teammate choose the same music,* Player 2 sees the music selection and decides whether to attend the concert or stay home. This determines the final points.

---

### Reminder (not shown to your teammate):

Remember, you and your teammate receive the same directions and will have the same interactions with your Team Leader in this game (unless otherwise noted like this message).

However, unlike you, this is the first game they are playing in this experiment, and so they do not have the experience of playing the first game.

---

Let's confirm that you understand the details of the game:

You cannot consult your teammate before deciding which music to play.

True

False

*If the subject answers incorrectly, they must try again until they select the correct response.*

-----  
**True, you and your teammate make your music choice separately.**  
-----

You cannot discuss or observe what your teammate selects before making your own choice.  
You and your teammate see different information and directions for this game.

True

False

*If the subject answers incorrectly, they must try again until they select the correct response.*

-----  
**False, you and your teammate see the exact same information and directions for this game.**  
-----

Your teammate played another game before this current game -- this is the second game your teammate is playing in this experiment.

True

False

*If the subject answers incorrectly, they must try again until they select the correct response.*

-----  
**False, this is the first game your teammate is playing in this experiment.**  
-----

Player 2 does not know whether you are a Rock band or a Pop band.

True

False

*If the subject answers incorrectly, they must try again until they select the correct response.*

-----

True, Player 2 never knows if you are a Rock band or a Pop band. Player 2 only learns if there is a concern and what type of music, *Original* or *Covers*, will be played at the concert.

-----

We will now ask you a series of questions to make sure you understand how points are earned in the game.

-----

You and your teammate are in a Pop band, you and your teammate both choose to play *Covers*, and Player 2 attends the concert.

How many points would you and your teammate earn? \_\_\_\_\_

How many points would Player 2 earn? \_\_\_\_\_

*Condition: The survey does not continue until the subject inputs the correct points earned.*

-----

You and your teammate are in a Pop band, you select *Covers* and your teammate selects *Original Music*.

How many points would you and your teammate earn? \_\_\_\_\_

How many points would Player 2 earn? \_\_\_\_\_

*Condition: The survey does not continue until the subject inputs the correct points earned.*

-----

You and your teammate are in a Rock band, you and your teammate both choose to play *Original Music*, and Player 2 stays home.

How many points would you and your teammate earn? \_\_\_\_\_

How many points would Player 2 earn? \_\_\_\_\_

*Condition: The survey does not continue until the subject inputs the correct points earned.*

---

Great, you understand the rules of the game.

Reminder (not shown to your teammate):

You and your teammate will be paired with the same Team Leader as in Game 1, **Pseudonym**. You will now be reintroduced to the Team Leader, as your teammate has not yet met Pseudonym:

---

In this game, we have paired you with a student from Washington State University who will be your Team Leader. The Team Leader's role is to provide advice to you during this game.

The Team Leader can offer advice by sending your team messages.

The Team Leader may give your team advice, but you and your teammate make individual choices. So your payout will be based only on your team's decisions, *NOT* on the decisions made by your Team Leader.

In contrast, the Team Leader is compensated based on how well their teams play the game, including your team.

This experiment was conducted from March 26th to March 30th and July 1st to July 30th, 2018, at Washington State University, from which we selected some students to be the Team Leaders for this study in which you are currently participating. To keep identities anonymous, we use pseudonyms for all Team Leaders. All other information about Team Leaders is an accurate reflection of the person.

---

*The same introduction displayed at the start of the experiment introducing the Team Leader is displayed.*

---

Before we start the game, we want you to have a **practice round**. Please consider what type of music you expect to play, then Left it below. This decision is not yet binding. You are not actually playing this type of music: it will not be submitted to play and you will not earn any money based on your decision.

- Original Music
- Covers
- Prefer not to respond

---

You selected [ ].

**If your teammate did not select Original Music**, the concern would have been cancelled and you would have **earned no bonus**.

**If your teammate also selected Original Music**, you would have **earned 150 to 50** points, depending on whether Player 2 attended the concert or stayed home.

---

Before you submit your actual music choice, you and your teammate will receive a message from Pseudonym. You will then have 90 seconds to make your final choice.

---

*The message from the team leader is one of the messages from below, consistent with the randomized assignment of the language treatment for the subject.*

*Most assertive:* I have developed and honed strong problem-solving skills, an ability that comes in handy in playing such games. I am confident that I can make a positive contribution to your team and if you follow my advice, you will earn more points. Play Original Music. This will convince Player 2 that you are a Rock Band.

*Moderately assertive:* Select original music to convince Player 2 that your band is a Rock Band.

*Least Assertive:* I am not sure what you should do. You should do what you think is best, but I think I would select Original Music to try to convince Player 2 that I am a Rock Band.

---

Reminder (not shown to your teammate):

- **You always get a bonus if you choose what your teammate selected.**
- **You never get a bonus if you choose differently from your teammate**
- **Your teammate has no prior experience with Pseudonym.**
- **Your teammate has not played a similar game**

Remember, you and your teammate are a Rock Band.

**Select your music:**

- Original Music
  - Covers
  - Prefer not to respond (0 points)
- 

You have selected [ ]. You will learn what your teammate selected, what Player 2 selected, and your final payout at the time of your bonus payment.

---

You have completed the second game. We will now move on to the final game.

In this game, you will again have the opportunity to earn money, and get advice from a Team Leader. Would you like to keep Pseudonym as the Team Leader who gives you advice? Or would you rather be paired with another Team Leader, whose performance on this final game is similar to Pseudonym?

- Select another Team Leader
- Keep my Team Leader

---

*Based on response, only one of the following is prompted:*

In this box below, describe why you decided to select a new Team Leader instead of keeping Pseudonym.

In this box below, describe why you decided to keep Pseudonym as your Team Leader.

---

-----Before we play the final game (*if selected*: and meet your new Team Leader), please answer the following questions about Pseudonym.

*For each statement below, subjects are asked whether they “Disagree strongly”, “Disagree”, “Disagree a little”, “Neither agree nor disagree”, “Agree a little”, “Agree”, “Strongly agree”, “Prefer not to respond”*

I would recommend Pseudonym as a colleague to others.  
I would recommend Pseudonym as a supervisor to others.  
Pseudonym's explanations were clear.  
I earned more points on Game 1 because of Pseudonym.  
Pseudonym made me feel confident in my ability to play the game.  
I enjoyed working with Pseudonym.

---

How would you describe Pseudonym?

- Not confident
- Somewhat confident
- Appropriately confident
- Overly confident
- Prefer not to respond

---

How would you rate Pseudonym's communication style?

- Submissive/under assertive
- Appropriately assertive
- Overly assertive/aggressive
- Prefer not to respond

---

Please answer the following questions about Pseudonym.

*For each statement below, subjects are asked whether they “Disagree strongly”, “Disagree”, “Disagree a little”, “Neither agree nor disagree”, “Agree a little”, “Agree”, “Strongly agree”, “Prefer not to respond”*

- Pseudonym was convincing in his/her messages.
- Pseudonym treated me with respect.
- Pseudonym would be approachable for an issue that bothered me.
- Pseudonym would keep calm and have good judgement in pressured situations.
- Pseudonym instilled a sense of teamwork.
- Pseudonym has effective leadership skills.
- Pseudonym was effective overall.
- Pseudonym exaggerated the value of his/her skills.
- Pseudonym has strong interpersonal skills.

---

During the first game, did Pseudonym send you this message?

*Four different messages are displayed. For each message, the subject is given the following options.*

- Yes, this is a message I received from Pseudonym
- No, this is not a message I received from Pseudonym
- Prefer not to answer

---

*Displayed only for subjects that selected a new team leader.*

**Meet your new Team Leader,**

Hi. My name is John, and I'm your Team Leader.

---

Let's move on to the final game.

Here are the rules of the final game: You will observe a grid of symbols, in which one of the symbols is missing. Your task is to choose which of the options best fits the missing symbol.

You have 60 seconds to make your selection. If you choose correctly, \$0.10 will be added to your compensation.

*Message from team leader:* Here is a hint: One of the patterns is that from left to right, the panel in the foreground moves one place to the left each time. This pattern continues to the next row.

---

This is the final game. Which option best first the missing symbol?

Here is a hint: One of the patterns is that from left to right, the panel in the foreground moves one place to the left each time. This pattern continues to the next row.

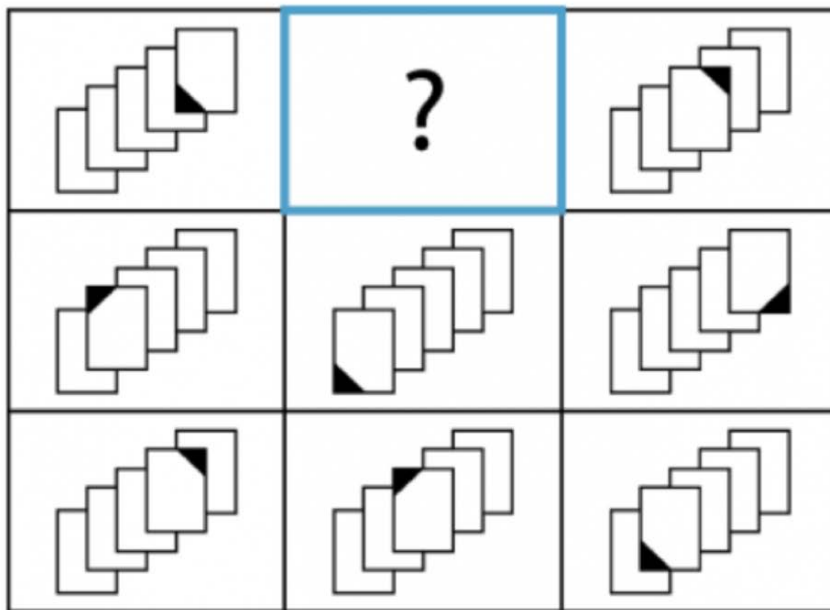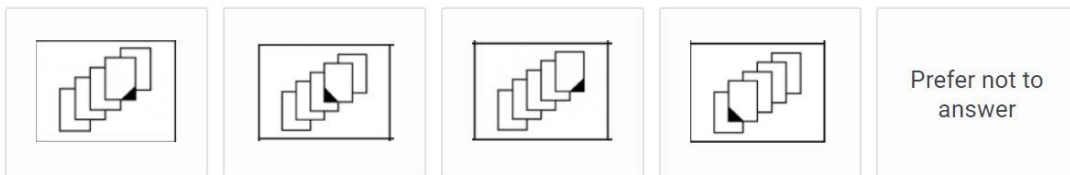

Please answer the following questions:

*For each statement below, subjects are asked whether they “Disagree strongly”, “Disagree”, “Disagree a little”, “Neither agree nor disagree”, “Agree a little”, “Agree”, “Strongly agree”, “Prefer not to respond”*

**In my relationship with others,**

I can get people to listen to what I say.  
my wishes do not carry much weight.  
I can get others to do what I want.  
even if I voice them, my views have little sway.  
I think I have a great deal of power.  
my ideas and opinions are often ignored.  
even when I try, I am not able to get my way.  
if I want to, I get to make decisions.

---

What was the gender of your first Team Leader?

- Female
  - Male
  - Other
  - Don't know
  - Prefer not to respond
- 

What was the name of your first Team Leader?

- Pseudonym
  - Alex
  - Natalie
  - Don't know
  - Prefer not to respond
-

What was the age of your first Team Leader?

- 18
  - 21
  - 23
  - Don't know
  - Prefer not to respond
- 

*If selected new team leader:*

What was the name of your second Team Leader?

- John
  - Brooke
  - Travis
  - Don't know
  - Prefer not to respond
- 

In this experiment, **Team Leaders differed by gender**. You will **earn a bonus** if you correctly guess the percent of MTurk Workers that followed the advice described below in the **first round of Game 1**. Recall, Game 1 was when you played individually and selected a number.

*Based on the accuracy of your guess,  
we will add to your bonus:*

| <b>Actual Percent -<br/>Your Guess</b> | <b>Payment<br/>Bonus</b> |
|----------------------------------------|--------------------------|
| <i>within 5 percent</i>                | \$0.25                   |
| <i>within 6 to 10 percent</i>          | \$0.18                   |
| <i>more than 11 percent</i>            | \$0.00                   |

**MALE TEAM LEADERS**

In the first round of Game 1, **what percent of MTurk Workers selected 4 after being given the following advice by a MALE Team Leader?** That is, for every 100 MTurk Workers, how many followed the advice below from a MALE Team Leader.

*Subjects are shown the male leader's avatar and the message they received from the first round of Game 1.*

Percent that followed the advice from a **male** team leader: \_\_\_\_\_

**FEMALE TEAM LEADERS**

In the first round of Game 1, **what percent of MTurk Workers selected 4 after being given the following advice by a FEMALE Team Leader?** That is, for every 100 MTurk Workers, how many followed the advice below from a FEMALE Team Leader.

*Subjects are shown the female leader's avatar and the message they received from the first round of Game 1.*

Percent that followed the advice from a **female** team leader: \_\_\_\_\_

-----

We will now ask you about Game 2. You will **earn an additional bonus** if you guess correctly the percent of MTurk Workers that followed the advice described below in **Game 2**. We are only asking about MTurk Workers who played Game 1 and Game 2 (not the teammates who only played Game 2). Recall, Game 2 was when you played in a team and selected whether to play Original Music or Covers.

*Based on the accuracy of your guess,  
we will add to your bonus:*

| <b>Actual Percent -<br/>Your Guess</b> | <b>Payment<br/>Bonus</b> |
|----------------------------------------|--------------------------|
| <i>within 5 percent</i>                | \$0.25                   |
| <i>within 6 to 10 percent</i>          | \$0.18                   |
| <i>more than 11 percent</i>            | \$0.00                   |

**MALE TEAM LEADERS**

In Game 2, **what percent of MTurk Workers selected Original Music after being given the following advice by a MALE Team Leader?** That is, for every 100 MTurk Workers, how many followed the advice below from a MALE Team Leader?

*Subjects are shown the male leader's avatar and the message they received in Game 2.*

Percent that followed the advice from a **male** team leader: \_\_\_\_\_

**FEMALE TEAM LEADERS**

In Game 2, **what percent of MTurk Workers selected Original Music after being given the following advice by a FEMALE Team Leader?** That is, for every 100 MTurk Workers, how many followed the advice below from a *FEMALE* Team Leader?

*Subjects are shown the female leader's avatar and the message they received in Game 2.*

Percent that followed the advice from a **female** team leader: \_\_\_\_\_  
-----

We would now like to ask you about how you would give advice if you were a Team Leader.

If you were selected to be a Team Leader in Game 1, which subset of messages would you prefer to use?

| Option A                                                                                                                               | Option B                                                          | Option C                                                                                                                                     |
|----------------------------------------------------------------------------------------------------------------------------------------|-------------------------------------------------------------------|----------------------------------------------------------------------------------------------------------------------------------------------|
| I played 4. Follow my lead and choose 4.                                                                                               | I played 4.                                                       | I played 4 but I'm not an expert at this game.                                                                                               |
| I have extremely strong problem-solving skills and my advice can be an asset to you. When you play 4, Player 2 guesses you are Type B. | When you play 4, Player 2 guesses you are Type B.                 | You probably have better problem-solving skills than I do, but here is what I am thinking: When you play 4, Player 2 guesses you are type B. |
| I have earned the trust of my peers in the past, and I strongly encourage you to play 4.                                               | When you play 4, Player 2 is more likely to think you are type B. | I don't know, but playing 4 seems like it's working.                                                                                         |

- Option A
  - Option B
  - Option C
  - Prefer not to answer
-

How would you characterize the language used in the following messages?

*Subjects are shown all the messages they received in Game 1.*

- More masculine (i.e., more representative of the type of language used by males)
  - More feminine (i.e., more representative of the type of language used by females)
  - Gender-neutral (i.e., equally representative of the type of language used by males and females)
  - Prefer not to answer
- 

Have you ever had a job, internship, or volunteer position?

- Yes
  - No
  - Prefer not to respond
- 

*If selected yes:*

Have you ever had a female supervisor?

- Yes
  - No
  - Prefer not to respond
- 

We would like to ask some final questions about you:

What is your gender?

- Male
- Female
- Other
- Prefer not to answer

---

What is your age? \_\_\_\_\_

---

What is the highest degree or level of school you have completed? (If currently enrolled, mark the previous grade or highest degree received.)

- Less than Grade 12 (No Diploma)
  - Regular High School Diploma
  - GED or alternative credential
  - Some college credit, but less than 1 year of college credit
  - 1 or more years of college credit, no degree
  - Associate's degree (for example: AA, AS)
  - Bachelor's degree (for example: BS, BA)
  - Master's degree (for example: MA, MS MEng, MEd, MSW, MBA)
  - Professional degree beyond a bachelor's degree (for example: MD, DDS, DVM, LLB, JD)
  - Doctorate degree (for example: PhD, EdD)
  - Prefer not to answer
- 

On which type of device did you complete this HIT:

- Laptop/Desktop Computer
- Mobile phone
- Other
- Prefer not to answer

If other, please describe: \_\_\_\_\_

---

Did you discuss, hear, or read information about the contents of this experiment prior to participation?

- Yes
- No
- Prefer not to answer

If yes, please describe what you knew of the experiment: \_\_\_\_\_

---

A random number generator will select which round will determine your payment for Game 1.

This concludes the experiment. In addition to the \$2.50 participation payment, you will be paid a bonus as follows.

For game 1, you will be paid for Round [ ]. This earns you \$[ ].

Your team leader earned 5920 total points, which was in Bin 18. Based on your guess of where your team leader fell in the range of possible points, you have earned \$[ ].

Your answer for game 3 was [incorrect/correct]. You earned \$[ ].

Thank you for participating in this experiment.

Upon the completion of the experiment, you will be informed of additional results and your additional bonus amounts. This will be based on your team's performance in Game 2 and your estimation of how other MTurk Workers performed in this experiment.

---

**Your MTurk completion code is [ ]:** Please copy and paste this code into the box on MTurk.

If you are interested in learning about the results of this study, you can contact us via e-mail at [UCMercedEconomicsExperiment@gmail.com](mailto:UCMercedEconomicsExperiment@gmail.com) with the subject heading "Interested in Survey Results", and we will put you on an e-mail list serve that will receive a summary of the results upon publication of the study. (This is optional and does not affect your payment.)

If you have any questions, feedback, or concerns, please note them in box below.

---

We thank you for your time spent taking this survey. Your response has been recorded.

Title of Study: **Understanding Factors in Completing Tasks**

**Purpose and Background**

You are invited to participate in a research study to understand factors that influence how individuals make decisions to complete tasks. This study is being conducted by Ketki Sheth of the University of California at Merced, and Shanthi Manian of Washington State University.

Before you decide to participate in this study, it is important that you understand why the research is being done and what it will involve. Please take time to read the following information carefully. Please ask the researchers if there is anything that is not clear, or if you need more information.

Your participation in this experiment will provide a greater understanding of how tasks are completed.

**Study Procedure**

If you agree to participate in this study, we will ask you to participate in an experiment that typically is completed within an hour. The experiment will take place on a computer and will be comprised of answering survey questions and playing simple computer games.

All your responses will remain confidential and will be shared only with an external research team.

**Risks**

We do not anticipate any risks to you participating in this study other than those encountered in day-to-day life.

**Benefits**

There are no direct benefits to you for your participation in this study.

**Compensation**

If your work is not rejected, you will receive monetary compensation between \$2.88 to \$8.74 for you in exchange for your time and participation in the study. The exact amount will depend on how you perform in the experiment.

**Subject Withdrawal**

You may decide to stop participation in this study at any time. You do not have to answer all of the questions. You may withdraw from the study at any time.

You may be withdrawn from the study without your consent if the researchers believe it is in your best interest, or if you fail to follow study procedures.

The investigators may, in their absolute discretion, terminate the study at any time.

### **Alternatives**

There are no alternatives to this procedure other than exercising your option to refuse to participate or to stop participation at any time.

### **Confidentiality**

Every effort will be made by the researcher to preserve your confidentiality including the following:

- Assigning code numbers for participants that will be used on all researcher notes and documents.
- Participant data will be kept confidential and be de-identified.
- All responses will be stored electronically using password protections.

Absolute confidentiality cannot be guaranteed, since research documents are not protected from subpoena.

### **Questions**

If you have any questions or concerns relating to this study in the future, you may contact Shanthi Manian at [shanthi.manian@wsu.edu](mailto:shanthi.manian@wsu.edu) or Ketki Sheth at [ksheth@ucmerced.edu](mailto:ksheth@ucmerced.edu).

For questions about your rights while taking part in this study, call the Office of Research at (209) 383-8655 or write to the Office of Research, 5200 North Lake Rd, UC Merced, Merced, California 95343. The Office of Research will inform the Institutional Review Board which is a group of people who review the research to protect your rights. If you have any complaints or concerns about this study, you may address them to Ramesh Balasubramaniam, Chair of the IRB, at (209) 383-8655, [irbchair@ucmerced.edu](mailto:irbchair@ucmerced.edu).

### **Consent**

Your participation in this study is voluntary. It is up to you to decide whether or not to take part in this study.

If you do decide to take part in this study, you will be asked to consent. You are free to not answer any question or questions if you choose.

By selecting to consent:

- You confirm that you have read and understand the information and have had the opportunity to ask questions.
- You understand that your participation is voluntary and that you are free to withdraw at any time, without giving a reason and without cost.
- You voluntarily agree to take part in this study.
- You are over the age of 18.

PARTICIPATION IN RESEARCH IS VOLUNTARY. You have the right to decline to participate or to withdraw at any point in this study without jeopardy.

If you wish to participate, please select the “I consent” button to continue to the research study. Otherwise, please select “I do not consent” and this session will terminate.
